# Supplementary material for: The effectiveness of general practice-based health checks on health behaviour and incidence on non-communicable diseases in individuals with low socioeconomic position: a randomised controlled trial in Denmark
Source: PubMed Central journal article supplement — BMJ Open. 2019 Sep 18;9(9):e029180. doi: 10.1136/bmjopen-2019-029180 (PMC6756442; doi:10.1136/bmjopen-2019-029180), 2019-09-18
Supplement: bmjopen-2019-029180.draft_revisions.pdf [file bmjopen-2019-029180.draft_revisions.pdf]

# BMJ Open

BMJ Open is committed to open peer review. As part of this commitment we make the peer review history of every article we publish publicly available.

When an article is published we post the peer reviewers' comments and the authors' responses online. We also post the versions of the paper that were used during peer review. These are the versions that the peer review comments apply to.

The versions of the paper that follow are the versions that were submitted during the peer review process. They are not the versions of record or the final published versions. They should not be cited or distributed as the published version of this manuscript.

BMJ Open is an open access journal and the full, final, typeset and author-corrected version of record of the manuscript is available on our site with no access controls, subscription charges or pay-per-view fees (<http://bmjopen.bmj.com>).

If you have any questions on BMJ Open's open peer review process please email [info.bmjopen@bmj.com](mailto:info.bmjopen@bmj.com)

# BMJ Open

## The effectiveness of general practice-based health checks on health behaviour and incidence on non-communicable diseases in individuals with low socioeconomic position: a randomized controlled trial

|                               |                                                                                                                                                                                                                                                                                                                                                                                                                                                                                                                                                                                                                                                                                                                                                 |
|-------------------------------|-------------------------------------------------------------------------------------------------------------------------------------------------------------------------------------------------------------------------------------------------------------------------------------------------------------------------------------------------------------------------------------------------------------------------------------------------------------------------------------------------------------------------------------------------------------------------------------------------------------------------------------------------------------------------------------------------------------------------------------------------|
| Journal:                      | <i>BMJ Open</i>                                                                                                                                                                                                                                                                                                                                                                                                                                                                                                                                                                                                                                                                                                                                 |
| Manuscript ID                 | bmjopen-2019-029180                                                                                                                                                                                                                                                                                                                                                                                                                                                                                                                                                                                                                                                                                                                             |
| Article Type:                 | Research                                                                                                                                                                                                                                                                                                                                                                                                                                                                                                                                                                                                                                                                                                                                        |
| Date Submitted by the Author: | 15-Jan-2019                                                                                                                                                                                                                                                                                                                                                                                                                                                                                                                                                                                                                                                                                                                                     |
| Complete List of Authors:     | Kamstrup-Larsen, Nina; National Institute of Public Health Dalton, Susanne; Danish Cancer Society, Department of Psychosocial Cancer Research, Institute of Cancer Epidemiology<br>Grønbo, Morten; National Institute of Public Health, Stem Cell Programme<br>Broholm-Jørgensen, Marie; National Institute of Public Health Thomsen, Janus Laust; Research Unit for General Practice, Department of Clinical Medicine; Aalborg University Hospital<br>Larsen, Lars; Syddansk Universitet, Research Unit of General Practice<br>Johansen, Christoffer; Danish Cancer Society, Department of Psychosocial Cancer Research, Institute of Cancer Epidemiology<br>Tolstrup, Janne; National Institute of Public Health, Centre for Alcohol Research |
| Keywords:                     | General practitioner, Health check, PREVENTIVE MEDICINE, SOCIAL MEDICINE, Randomized controlled trial                                                                                                                                                                                                                                                                                                                                                                                                                                                                                                                                                                                                                                           |
|                               |                                                                                                                                                                                                                                                                                                                                                                                                                                                                                                                                                                                                                                                                                                                                                 |

SCHOLARONE™  
Manuscripts

1  
2  
3  
4  
5  
6  
7  
8  
9  
10  
11  
12  
13  
14  
15  
16  
17  
18  
19  
20  
21  
22  
23  
24  
25  
26  
27  
28  
29  
30  
31  
32  
33  
34  
35  
36  
37  
38  
39  
40  
41  
42  
43  
44  
45  
46  
47  
48  
49  
50  
51  
52  
53  
54  
55  
56  
57  
58  
59  
60

**The effectiveness of general practice-based health checks on health behaviour and incidence on non-communicable diseases in individuals with low socioeconomic position: a randomized controlled trial**

Nina Kamstrup-Larsen, PhD Student<sup>1</sup>, Susanne Oksbjerg Dalton, Senior Researcher and Group Leader<sup>2</sup>, Morten Grønbaek, Director<sup>1</sup>, Marie Broholm-Jørgensen, Postdoc<sup>1</sup>, Janus Laust Thomsen, Clinical Professor<sup>3</sup>, Lars Bruun Larsen, PhD Student<sup>4</sup>, Christoffer Johansen, Guest Professor<sup>2</sup>, Janne Schurmann Tolstrup, Professor<sup>1</sup>

**Affiliations:** <sup>1</sup> National Institute of Public Health, University of Southern Denmark, Copenhagen, Denmark, <sup>2</sup> Danish Cancer Society Research Center, Copenhagen, Denmark, <sup>3</sup> Research Unit for General Practice in Aalborg, Department of Clinical Medicine, Aalborg University Hospital, Aalborg, Denmark, <sup>4</sup> Research Unit of General Practice, University of Southern Denmark, Odense, Denmark,

**Address correspondence to:** Nina Kamstrup-Larsen, National Institute of Public Health, University of Southern Denmark, Copenhagen, Studiestræde 6, 1455 Copenhagen, Denmark. [nkal@niph.dk], +45-65507818

Number of words: 3,990 (exclusive of abstract, references, declarations, figures and tables)

## Abstract

**Background** The effectiveness of health checks aimed at the general population is disputable. However, health checks aimed at certain groups at high risk may reduce adverse health behaviour and identify persons with metabolic risk factors and non-communicable diseases (NCDs).

**Objectives** To assess the effect of general practice-based health checks on health behaviour and incidence on NCDs in individuals with low socioeconomic position.

**Methods** Individuals with no formal education beyond lower secondary school and aged 45-64 years were randomly assigned to the intervention group of a preventive health check or to control group of usual care in a 1:1 allocation. Randomization was stratified by gender and 5-year age group. Due to the real-life setting, blinding of participants was only possible in the control group. Effects were analysed as intention-to-treat and per protocol. The trial was undertaken in 32 general practice units in Copenhagen, Denmark.

**Intervention** Invitation to a prescheduled preventive health check from the general practitioner followed by a health consultation and an offer of follow-up with health risk behaviour change or preventive medical treatment, if necessary.

**Primary outcome measures** Smoking status at 12-month follow-up. Secondary outcomes included status in other health behaviours such as alcohol consumption, physical activity and body mass index (measured by self-administered questionnaire), as well as incidence of metabolic risk factors and NCDs such as hypertension, hypercholesterolemia, chronic obstructive pulmonary disease, type-2 diabetes mellitus, hypothyroidism, hyperthyroidism and depression drawn from national health care registries.

**Results** 1,104 participants were included in the study. For the primary outcome, 710 participants were included in the per protocol analysis, excluding individuals who did not attend the health check, and 1,104 participants were included in the intention to treat analysis. At 12-month follow-up 37% were daily smokers in the intervention group and 37% in the control group (OR 0.99, 95% CI 0.76 to 1.30). No difference in health behaviour nor in the incidence of metabolic risk factors and NCDs between the intervention and control group were found. Side effects were comparable across the two groups.

1  
2 **Conclusion:** The lack of effectiveness may be due to low intensity of intervention, a high prevalence of  
3  
4 metabolic risk factors and NCDs among the participants at baseline as well as a high number of contacts  
5  
6 with the general practitioners in general or to the fact that general practices are not an effective setting for  
7  
8 prevention.  
9

10  
11 **Trial registration** Clinical Trials NCT01979107.  
12  
13  
14  
15  
16  
17

#### Strengths and limitations of this study

- A major strength of this study is that it is a large-scale community-based health check intervention implemented in 32 general practice clinics and evaluated with long follow-up (1 year) and in a randomized controlled design.
- The study targets both health behavior changes and detection of non-communicable diseases and combines both patient-reported and register-based outcomes.
- The patient-reported data were linked at the individual level with national health register and obtained information on non-communicable diseases, which ensured no loss to follow-up regarding this outcome.
- The study focuses on individuals with low socioeconomic – an under-studied group in health check interventions.
- The limitations of this study include the lack of data on smoking status in non-respondents and no access to primary care medical records with details on any condition not leading to hospital contact.

## Introduction

There is a large body of evidence that developing non-communicable diseases (NCDs) is closely linked with modifiable health behaviours such as smoking, alcohol consumption, poor diet and physical inactivity as well as metabolic risk factors such as hypertension, lipid levels and blood glucose, and obesity (1). Health checks may identify individuals with adverse health behaviour and detect metabolic risk factors and NCDs at an early stage (2). To prevent NCDs or limit future harms from NCDs, health checks may provide an opportunity to motivate for behavioural change or to initiate appropriate preventive medical treatment.

Benefits of general preventive health checks are, however, disputed. One Cochrane review, which included 14 trials on general health checks (N=533-57,460), concluded that health checks offered to the general population did not reduce morbidity or mortality beyond that of usual care (3). Most of the included trials, however, took place 20-30 years ago, prior to the introduction of much of the preventive medication in current use (4). A more recent meta-analysis, including six trials conducted in general practice (N=1442-7229) showed improvements in blood pressure, total cholesterol and body mass index (BMI), and reduced the proportion of patients remaining at high risk for NCDs (5). Amongst others, low socioeconomic position (SEP) has been shown to be associated with non-participation in health checks (3, 6-9). Because of the lower participation among individuals of low SEP (8) and a social gradient in modifiable adverse health behaviours and NCDs (1, 10, 11) it has been suggested that further research in the field of health check should put an extra effort into recruiting especially socioeconomically disadvantaged individuals (3, 8).

In Denmark, general practice and municipalities have a shared responsibility for preventive services aimed at the individual. General practitioners (GP) assess patient health and implement disease-specific secondary prevention, the municipalities are tasked with primary prevention such as smoking cessation, alcohol treatment, and other lifestyle related services (12). GPs collaborate closely with municipal services and can refer to some services, for instance, lifestyle change programs at the municipality health centre (13).

Visiting the GP is free of charge, and around 98% of the population is assigned to one specific GP (14).

The Check-In randomised controlled trial (RCT) was developed to test the effectiveness of a preventive health check at the general practice offered to individuals with low SEP as measured by short education.

1  
2 We set out to test if Check-In results in lower prevalence of adverse health behaviour such as smoking,  
3  
4 excessive alcohol consumption, physical inactivity and obesity, and to test if Check-In results in more new  
5  
6 hospital contacts and prescription medication for metabolic risk factors and NCDs such as hypertension,  
7  
8 hypercholesterolemia, COPD, T2DM, hypothyroidism, hyperthyroidism and depression. In this article we  
9  
10 report on the effects of Check-In at 12-month follow-up.  
11  
12  
13  
14  
15  
16

## 17 **Method and material**

### 18 *Trial design*

19  
20  
21  
22  
23 Check-In was a two-arm 1:1 randomized controlled trial conducted in Copenhagen, Denmark from January  
24  
25 2014 to September 2016. The trial was notified to the Danish Data Protection Agency (J.nr. 16/100534) and  
26  
27 a notification regarding the project was made to The National Committee on Health Research Ethics.  
28  
29 However, according to the Act on Research Ethics Review of Health Research Projects (section 14,2)  
30  
31 projects like Check-In does not need ethical approval from a Research Ethics Board (Protocol no.: H-1-2013-  
32  
33 FSP). The trial is registered at ClinicalTrials.gov (ID NCT01979107; October 25, 2013).  
34  
35  
36  
37  
38  
39  
40

### 41 *Recruitment and participants*

42  
43 All 126 general practices in four different suburbs of Copenhagen, Denmark, were invited by letter and  
44  
45 phone to participate in the study.  
46  
47

48  
49 GPs do not systematically register their patients' educational level. Therefore, to identify the study  
50  
51 population baseline questionnaires in Danish (including questions about educational level) were sent out to  
52  
53 all individuals aged 45-64 years, who lived in Copenhagen and who were on the participating GPs' patient  
54  
55 lists. The questionnaire was accompanied by a short letter from the GP and the research team describing  
56  
57 that the questionnaire information would be entered into the electronic patient record at the GP, and thus  
58  
59 could be used in future visits. Furthermore, it was explained that the questionnaire was part of a larger  
60

1  
2 research project and that participation was voluntary and without negative consequences for the  
3  
4 continuing doctor-patient relationship. At the end of the questionnaire, individuals were asked to indicate if  
5  
6 they would consent to be contacted for participation in a future research project.  
7  
8

9 Inclusion criteria were no formal education beyond lower secondary school and consent to be contacted  
10  
11 for research purpose. No exclusion criteria were implied.  
12  
13  
14  
15  
16  
17

### 18 *Randomization*

19  
20 Eligible patients were randomized in SAS by a data manager to either Check-In or usual care in a 1:1  
21  
22 allocation. The randomization was stratified by gender and 5-year age group. Couples living together were  
23  
24 allocated to the same group to avoid contamination.  
25  
26

27  
28 Due to the real-life setting, blinding of participants was only possible in the control group.  
29  
30  
31  
32  
33

### 34 *Interventions*

#### 35 Check-In group (intervention)

36  
37  
38 The intervention included I) an invitation to a prescheduled health check, II) a health check at the GP, III) a  
39  
40 health consultation at the GP and an offer of further action if necessary.  
41  
42  
43  
44

#### 45 I) *Invitation*

46  
47  
48 All participants allocated to the intervention group received a postal invitation to a prescheduled health  
49  
50 check from their GP and the research team. Included with the invitation was a written description of the  
51  
52 project. Furthermore, it was clarified that study participation was voluntary and that withdrawal could  
53  
54 occur at any time. Three days before the prescheduled appointment, participants in the intervention group  
55  
56 were reminded by phone by a member of the research team.  
57  
58  
59  
60



1  
2           II)        *Health check*  
3  
4

5       Before the health check the GPs received results from the patient-reported questionnaire in the GPs  
6  
7       electronic patient record in the form of an electronic data interchange (EDI) message including summed  
8  
9       scores and categorization of items from the baseline questionnaire (see supplementary). The health check  
10  
11       took place at the general practice clinic to which the patient was registered and was conducted by either  
12  
13       the GP or other health staff at the clinic as per usual clinical practice. The health check consisted of  
14  
15       measurements of weight and height, hip and waist circumference, cholesterol, glycated haemoglobin,  
16  
17       thyroidal status and spirometry for smokers or former smokers. The health consultation with the purpose  
18  
19       of review of results was scheduled at the health checks.  
20  
21

22  
23  
24           III)       *Health consultation*  
25  
26

27       At the health consultation the GP reviewed the results from the health check in combination with the  
28  
29       summarized results of the questionnaire. Participants with abnormal screens, or health behaviour  
30  
31       amenable to intervention at the health check, either follow the medical standards for general practice on  
32  
33       procedures for diagnostics and treatment or received the offer of a referral to the municipality health  
34  
35       centre for a lifestyle change program. Furthermore, these participants were offered an additional health  
36  
37       check scheduled six months after the first health check. Decisions and reasons for referral or not were  
38  
39       indicated by the GP in a project specified form.  
40  
41

42  
43       Usual care (control)  
44  
45

46       Participants allocated to the control group received unrestricted usual care during the intervention period.  
47  
48       The results from the questionnaires were entered in the GPs electronic patient record, however, no  
49  
50       feedback was provided to the patients.  
51  
52

53  
54  
55  
56  
57       *Measurement of health behaviour*  
58  
59  
60

1  
2 Health behaviour was measured from a self-administrated questionnaire at baseline and at 12-month  
3  
4 follow-up. The questionnaire contained information about sociodemographic characteristics (education  
5  
6 level, cohabitation status), health related quality of life (12-Item Short Form Health Survey) (15, 16), height  
7  
8 and weight, smoking status, alcohol consumption, physical activity, diet, pulmonary symptoms, family  
9  
10 dispositions of chronic diseases, general self-efficacy (17, 18) and stress (measured by Cohen's 10-items  
11  
12 Perceived Stress Scale) (19).

13  
14  
15  
16 The primary outcome was self-reported smoking status at 12-month follow-up. Questions included "Do you  
17  
18 smoke?", with the response categories "yes, daily", "yes, I smoke occasional", "no, I stopped less than six  
19  
20 months ago", "no, I stopped more than six months ago", "no, I have never smoked"; dichotomized into  
21  
22 'daily smokers' vs 'not daily smokers', and "How much do you approximately smoke each day?" used as  
23  
24 continuous outcome.

25  
26  
27  
28 Secondary outcomes included self-reported alcohol consumption, physical activity, BMI, self-efficacy and  
29  
30 perceived stress. Alcohol consumption was measured as binge drinking (five or more units of alcohol on the  
31  
32 same occasion) dichotomized into 'weekly or more frequent' vs 'less than weekly', and units of alcohol each  
33  
34 day during the week used as a continuous outcome. Physical activity was measured from two questions on  
35  
36 hours spend on exercise "making you short of breath" during the week and everyday exercise,  
37  
38 dichotomized into physical inactivity (yes, no), 'yes' defined as less than 150 minutes of moderate-intensity  
39  
40 physical activity throughout the week, less than 75 minutes of vigorous-intensity physical activity  
41  
42 throughout the week or an equivalent combination of moderate- and vigorous-intensity activity and 'no'  
43  
44 defined as more, as defined by WHO (20). BMI was generated from questions about height and weight and  
45  
46 analysed as a dichotomized outcome into obese yes/no, 'yes' defined as  $BMI \geq 30$  and 'no' defined as  
47  
48  $BMI < 30$  (21) and as a continuous outcome (see supplementary).

49  
50  
51  
52  
53  
54  
55  
56  
57 *Measurement of metabolic risk factors and NCDs*  
58  
59  
60

1  
2 Metabolic risk factors and NCDs were measured as any hospital contact and/or prescription medication for  
3  
4 hypertension, hypercholesterolemia, chronic obstructive pulmonary disease (COPD), type-2 diabetes  
5  
6 mellitus (T2DM), thyroid disease and depression in the follow-up period. ICD-10 codes and ATC-codes were  
7  
8 specified for each of the conditions. The algorithm in supplementary give an overview of the used  
9  
10 definitions (Appendix 3).

11  
12  
13  
14 All citizens with a permanent residence In Denmark have a unique personal identification number (CPR-  
15  
16 number), which makes it possible to link individual information from surveys to nation-wide administrative  
17  
18 registries (22). For information about hospital contacts and discharge diagnoses we linked to the Danish  
19  
20 National Patient Register (23). The Danish National Prescription Registry (24) was used to obtain  
21  
22 information on dispensed prescription medications.

23  
24  
25  
26 To ensure that only new contacts and/or prescription medication of metabolic risk factors and NCDs were  
27  
28 included in the incidence analysis, register-based data on metabolic risk factors and NCDs were collected  
29  
30 for a period of 15 years for diagnosis and 2 years for prescription medication before the baseline  
31  
32 questionnaire were sent.

33  
34  
35  
36 Furthermore, information on date of death was extracted from the Danish Register of Causes of Death (25).  
37  
38 The Danish National Health Services Register was used for information on contacts with the general  
39  
40 practice (14).

#### 41 42 43 44 45 *Sample size consideration*

46  
47  
48 The number of individuals to include in the Check-In and usual care group were determined prior to data  
49  
50 collection. Sample size calculation was performed to test the difference between two proportions (26). We  
51  
52 expected a participation rate of 75% for the health check. Based on prevalence from the Danish National  
53  
54 Health Survey from 2010, a daily smoking prevalence of 41% was assumed in the 45-64-year-old individuals  
55  
56 with basic education; of these we expected that 50% were motivated to quit smoking (27). High-standard  
57  
58 smoking cessation courses have been shown to yield a cessation prevalence of 20-30% (28). In the usual  
59  
60

1  
2 care group, we expected a cessation prevalence of 5%. Thus, we needed 150 daily smokers in each arm to  
3  
4 detect a difference in quit rates of 15% with 80% power.  
5  
6  
7  
8

### 9 *Statistical analysis*

10  
11 To compare health behaviour at 12-month follow-up in the Check-In and usual care group logistic  
12  
13 regression modelling estimated intervention effectiveness on the binary outcomes daily smoking, binge  
14  
15 drinking, obesity and physical inactivity. The model included the condition variable (Check-In versus usual  
16  
17 care). For the continuous outcomes, cigarettes per day (among daily smokers), drinks per week (among  
18  
19 those who drink alcohol) and BMI, median regression were conducted, and interquartile range (IQR) were  
20  
21 estimated.  
22  
23  
24  
25

26 The analyses were performed i) per protocol, excluding individuals who did not attend the health check and  
27  
28 ii) intention-to-treat (ITT). ITT analyses are recommended in the CONSORT statement (29) and implies that  
29  
30 all randomized individuals are included in the analysis regardless of whether they attended the  
31  
32 prescheduled health check or not. For the ITT analyses, we estimated missing data using multiple  
33  
34 imputation (30). The imputation process for each outcome utilized participant's sex, age, ethnicity,  
35  
36 cohabitant and employment status, condition variable and baseline specific variable. Twenty imputations  
37  
38 were undertaken for each imputation, estimate and pooled results from these were used. In general,  
39  
40 missing at specific item responses were low at baseline (less than 5%) – except for *drinks per week* (7%  
41  
42 missing) and *self-efficacy* (6% missing) (data not shown). Final levels of missing data on primary outcome  
43  
44 were 1% at baseline and 25% at 12-month follow-up. Missing at follow-up was primary due to non-  
45  
46 response.  
47  
48  
49  
50

51 To compare metabolic risk factors and NCDs at 12-month follow-up in the Check-In and usual care group  
52  
53 logistics regression were conducted for each of the outcomes hypertension, hypercholesterolemia, COPD,  
54  
55 diabetes, hypothyroidism and hyperthyroidism. Furthermore, the analyses were conducted for *Any new*  
56  
57 *chronic condition*, defined as 'yes' if any new metabolic or NCDs were found in the follow-up period.  
58  
59  
60

1  
2 The analyses were performed both regarding *all* contacts/prescription medication (prevalence) and *first*  
3 contacts/prescriptions for metabolic risk factors and NCDs (incidence). The prevalence analysis included all  
4 individuals who had contact with the hospital and/or prescription medication for the metabolic risk factors  
5 and NCDs in the 12-month follow-up period. The incidence analyses excluded individuals who already had  
6 the specific metabolic risk factor or NCD at baseline. Information on metabolic risk factors and NCDs were  
7 obtained from registers and no missing occurred in these variables.  
8  
9  
10  
11  
12  
13  
14  
15

16 To evaluate the stability of our results an Interclass Coefficient (ICC) was estimated within a two-level  
17 model with patients (level 1) nested within general practices (level 2), and all estimates were calculated in  
18 the model including the condition variable and general practices as random intercept, allowing for  
19 correlation between patients from the same general practice (31). Furthermore, sensitivity analysis  
20 including age and sex in the logistic regression were carried out.  
21  
22  
23  
24  
25  
26  
27  
28  
29

### 30 *Patient and public involvement*

31  
32 Patients were not formally involved in the development of the trial. The Check-In intervention was,  
33 however, developed in close integration with general practitioners. Before Check-In was rolled out in the  
34 bigger scale the feasibility of the intervention was tested in a pilot study. In the pilot study the  
35 questionnaire was tested among the target group by interviewing them after they filled it in and non-  
36 responders were contacted by phone to include their experiences and reasons to not answer. Participants  
37 will not be directly contacted with results. All findings, including null findings will be communicated to the  
38 public by use of press releases and a report in lay-language.  
39  
40  
41  
42  
43  
44  
45  
46  
47  
48  
49  
50

## 51 **Results**

### 52 *Participant flow*

53  
54 Of the 126 general practices invited, 32 clinics, including 56 GPs, agreed to participate (clinic level  
55 participation 25%). Figure 1 shows the flow diagram of Check-In. In total, 17,063 patients were mailed a  
56  
57  
58  
59  
60

1  
2 baseline questionnaire. Of the 9,790 who responded to the baseline questionnaire, 1,104 met the inclusion  
3  
4 criteria regarding level of education and marked that they could be contacted again. Of the 1,104  
5  
6 participants, 549 were randomized to the Check-In group and invited to the prescheduled health check,  
7  
8 which 364 attended (attendance rate of 66%). Of the 1,104 participants, 850 completed the follow-up  
9  
10 questionnaire at 12 months (response rate of 77%). The number analysed for the 'per protocol' depended  
11  
12 on the specific outcome – for the primary outcome daily smoking this was 710, 303 for the Check-In group  
13  
14 and 407 for the usual care group. For the ITT analyses, the number of analysed equal the number allocated  
15  
16 to Check-In and usual care group, respectively (Figure 1).  
17  
18  
19  
20  
21  
22

### 23 *Baseline characteristics*

24  
25  
26 Table 1 shows the baseline characteristics for the Check-In and usual care group. The average age was 54  
27  
28 years, about half were men and more than 40% were unemployed or on social security. About 41%  
29  
30 reported daily smoking and 17% in the check-In group and 20% in the usual care group reported 'binge  
31  
32 drinking at least weekly'. Median BMI was 26, with 20% obese in check-In group and 23% in usual care  
33  
34 group at baseline. Overall, 61% in the Check-In and 64% in the usual care group, respectively, had at least  
35  
36 one NCD and 18% had  $\geq 3$  NCDs in the two groups. Around 88% had had contact with their GP within the  
37  
38 last year. The baseline characteristics were well balanced between the Check-In and usual care group  
39  
40 (Table 1).  
41  
42  
43  
44  
45  
46  
47

### 48 *Effectiveness of Check-In on daily smoking and other health behaviour*

49  
50  
51 After 12 months of follow-up no statistical significant difference was found between the Check-In and usual  
52  
53 care group on daily smoking, binge drinking, physical inactivity or obesity (Table 2) – this was seen in both  
54  
55 the per protocol and ITT analysis. All tests for comparison of number of cigarettes/day, units of alcohol/day  
56  
57 and BMI were statistically insignificant (Table 3) indicating no effect of Check-In on daily smoking or other  
58  
59 health behaviour.  
60

### *Effectiveness of Check-In on detection of metabolic risk factors and NCDs*

After 12 months of follow-up, we found a tendency towards higher incidence of hospital contacts and prescription medication in the Check-In group compared to the usual care group – for COPD and depression, however, only the results for depression were statistically significant in the ITT analysis (OR 2.90 (95% CI: 1.34-6.29)) (Table 4).

We found no statistically significant differences between the Check-In and the usual care group in prevalence of hypertension, hypercholesterolemia, COPD, T2DM, hypothyroidism, hyperthyroidism or depression (supplementary) – this was seen in both the per protocol and ITT analysis.

### *Stability of our results and sensitivity analysis*

The ICC was low (ICC=0.008) indicating that patients within the same general practice were not clustered, and all estimates from multi-level analyses (data not shown) showed no difference in estimates compared with estimates from logistics regression. The adjusted sensitivity analysis did not affect the estimates (data not shown).

### *Potential side effects*

To evaluate potential side effects of Check-In we analysed perceived level of stress for the Check-In and usual care group at 12-month follow-up. We found no difference between the two groups; both groups had a median at 16 on the perceived level of stress scale (IQR for Check-In 11,20; IQR for usual care 11,21) (data not shown).

## **Discussion**

1  
2 In this randomized controlled trial, we found no effect of an intervention of GPs invited individuals with low  
3  
4 SEP to a prescheduled preventive health check. We found no differences in smoking status, alcohol  
5  
6 consumption, physical inactivity, BMI or in the prevalence of metabolic risk factors and NCDs at 12-month  
7  
8 follow-up between the Check-In group and usual care group. We did, however, find a statistically significant  
9  
10 difference in incidence of depression, as measured by first prescription of antidepressant medication  
11  
12 between the Check-In and the usual care group at 12-month follow-up.  
13  
14

15  
16 The baseline characteristics showed that more than 40% of the participants were daily smokers (Table 1) as  
17  
18 compared to 17% in the general Danish population (32). This indicated that we did reach a group with a  
19  
20 more adverse health behaviour profile than the general population. However, the intensity of the  
21  
22 intervention might have been too low to achieve sufficient change of adverse health behaviour among  
23  
24 individuals with low socioeconomic position, which may have contributed to the lack of measurable  
25  
26 behavioural change in Check-In. In a previous Danish study of health checks a significant higher smoking  
27  
28 abstinence rate were found in a high intensity intervention group compared to usual care (33). The high  
29  
30 intensity intervention included a consultation based on motivational interviewing, complementary samples  
31  
32 of nicotine products, a self-help pamphlet, and the offer of participation in six smoking cessation group  
33  
34 counselling sessions over a period of 5 months (33). Moreover, higher socioeconomic position was a  
35  
36 predictor of successful smoking cessation (33). In contrast, Check-In relied on the behaviour change  
37  
38 services offered by the municipality since 2007 (13, 34). The idea in Check-In was that patients with adverse  
39  
40 health behaviour amenable to intervention at the health check should be offered a referral to the  
41  
42 municipality health centre for a free lifestyle change program. However, project data indicated that the  
43  
44 opportunity of a referral may have been under-utilized as some of the patients rejected a referral to the  
45  
46 municipality, and in some cases, the GP considered a referral to be irrelevant. The result was a low level of  
47  
48 intensity of the part of the intervention targeting adverse health behaviour.  
49  
50  
51  
52  
53

54  
55 Our results are, however, in line with the results from another study focusing at patients with high risk of  
56  
57 cardiovascular disease, as they found no differences in the proportion of non-smoking among patients in  
58  
59 the intervention compared with usual-care group (35).  
60



1  
2 The lack of effectiveness of Check-In regarding more new hospital contacts and prescription medication for  
3  
4 metabolic risk factors and NCDs can be ascribed to the fact that more than 70% of individuals included in  
5  
6 the study were known with one or more NCDs at baseline. Most had visited their GP within the last year  
7  
8 with a median number of contacts to the GP of 7 and 8 in the Check-In and usual care group respectively  
9  
10 (Table 1). Patients with a known NCD may, as such most likely, already be in some kind of scheduled  
11  
12 treatment at their GP. This illustrate that in terms of health, it is indeed a high-risk group participating in  
13  
14 Check-In, but the intervention may not in absolute numbers have picked up many individuals undiagnosed  
15  
16 with metabolic risk factors or NCDs, although we did see that there were more persons who initiated  
17  
18 treatment with antidepressants in the Check-In group compared to the usual care group. This is in line with  
19  
20 another Danish study (36).  
21  
22  
23  
24  
25  
26  
27

### 28 *Strengths and weaknesses*

30  
31 One strength of the study was that the randomization resulted in two balanced groups at baseline and  
32  
33 minimized the influence of known and unknown confounding in the comparison of the Check-In and the  
34  
35 usual care group. Another strength was the use of both patient-reported-outcomes and register-based  
36  
37 outcomes, where the use of register-based data allowed us to follow all individuals in the study  
38  
39 independent of attendance and respond to follow-up questionnaire. A third strength in Check-In was the  
40  
41 real-life setting, where the health checks were carried out at the general practice clinics to which the  
42  
43 patients were registered. Previous trials testing the effectiveness of preventive health check have been  
44  
45 criticized for designing a special unit to deliver the health check (4). In Check-In it was an assumption that  
46  
47 GPs, may be in a better position to deliver preventive health services than other health professionals and  
48  
49 can offer professional advice accounting for the patients' state of health in order to encourage compliance  
50  
51 (37).  
52  
53  
54  
55

56 A potential limitation in the study was contamination between groups, which potentially occurred if  
57  
58 patients in the usual care group had treatment beyond usual care, e.g. a health check in the intervention  
59  
60

1  
2 period or if GPs because of the project had more awareness of the preventive work such as smoking  
3  
4 cessation when seeing patients allocated to usual care regarding other health issues. However, the risk of  
5  
6 contamination is low because GPs did not know who were allocated to the usual care group and couples  
7  
8 living together were allocated to same group. If contamination had occurred the observed effectiveness of  
9  
10 the intervention is most likely conservative. Another limitation is the lack of data on smoking status in non-  
11  
12 respondents and that we had no access to GP chart notes – any condition not leading to hospital contact  
13  
14 are not registered. However, our inclusion of prescription medication should ensure the capture of  
15  
16 conditions only managed in general practice.  
17  
18

19  
20 It can be argued that the GPs who participated in Check-In were especially motivated, hence, if no effect on  
21  
22 health behaviour and detection of metabolic risk factors and NCDs are found with these GPs it is plausible  
23  
24 to say that no effect will be found if the intervention were rolled out to all GPs. However, further studies  
25  
26 are needed to understand non-participants and to understand the process after a preventive health at the  
27  
28 GP.  
29  
30  
31  
32  
33  
34  
35

### 36 **Conclusion**

37  
38 This study suggests that a systematic offer of a preventive health check at the general practice aimed at  
39  
40 individuals with low SEP have no effect on adverse health behaviour or incidence on metabolic risk factors  
41  
42 or NCDs compared to usual care. The explanations can be low intensity of intervention, a high prevalence  
43  
44 of metabolic risk factors and NCDs among the participants at baseline, a high number of contacts with the  
45  
46 GP in general or that general practices are not an effective setting for primary prevention.  
47  
48  
49  
50  
51  
52  
53  
54  
55  
56  
57  
58  
59  
60

**List of abbreviations**

95% CI = 95% confidence interval

BMI = body mass index

COPD = chronic obstructive pulmonary disease

EDI = electronic data interchange

GP = general practitioner

ITT = intention-to-treat

IQR = interquartile range

NCD = non-communicable disease

OR = odds ratio

RCT = randomised controlled trial

SEP = socioeconomic position

T2DM = type-2 diabetes mellitus

**Declarations**

Ethics approval and consent to participate

Check-In was developed to examine primary prevention aspects beyond existing standard clinical practice, thus no persons were refused access to standard clinical care. Participation was voluntary, and our information material highlighted the option to withdraw without further explanation and without consequences for any treatment or other contact with the GP. Personal identification is encrypted, and data is kept in accordance with the requirements of the Danish Data Protection Agency.

1  
2 The trial was notified to the Danish Data Protection Agency (permission 2015-57-0008, Acadre no.  
3  
4 16/100534) and the National Committee on Health Research Ethics was notified of the project. However,  
5  
6 according to the Act on Research Ethics Review of Health Research Projects (section 14.2), projects like  
7  
8 Check-In do not need ethical approval from a Research Ethics Board (Protocol no.: H-1-2013-FSP). The trial  
9  
10 is registered at ClinicalTrials.gov (Early detection of and intervention towards chronic diseases; ID  
11  
12 NCT01979107; October 25, 2013).  
13  
14  
15  
16  
17  
18

19 Consent for publication

20  
21  
22 Not applicable.  
23  
24  
25  
26  
27

28 Data sharing statement

29  
30  
31 The data that support the findings of this study is located at Statistics Denmark and is only available under  
32  
33 licence and are therefore not publicly available.  
34  
35  
36  
37  
38  
39

40 Competing interests

41  
42  
43 All authors declare that they have no competing interests.  
44  
45

46 All authors have completed the Unified Competing Interest form (available on request from the  
47  
48 corresponding author) and declare: no support from any organization for the submitted work [or describe if  
49  
50 any]; no financial relationships with any organizations that might have an interest in the submitted work in  
51  
52 the previous three years, no other relationships or activities that could appear to have influenced the  
53  
54 submitted work.  
55  
56  
57  
58  
59  
60

## Funding

The project was funded by the Danish Cancer Society. The Danish Cancer Society had no influence on design, analysis and interpretation of the results.

## Authors' contributions

NKL participated in the design of the study and its coordination and drafted the manuscript. JST participated in the design of the study. NKL and JST performed the statistical analysis. MBJ participated in the design of the study and its coordination. JLT participated in the design of the study. LBL participated in the design of the study. MG participated in the design of the study. CJ participated in the design of the study. SOD participated in the design of the study and its coordination and supervised the statistical analysis. All authors read and approved the final manuscript.

NKL affirms that the manuscript is an honest, accurate, and transparent account of the study being reported; that no important aspects of the study have been omitted; and that any discrepancies from the study as planned (and, if relevant, registered) have been explained.

The corresponding author has the right to grant on behalf of all authors and does grant on behalf of all authors, an exclusive license (or non exclusive for government employees) on a worldwide basis to the BMJ Publishing Group Ltd to permit this article (if accepted) to be published in BMJ editions and any other BMJPG products and sublicenses such use and exploit all subsidiary rights, as set out in our license.

## Acknowledgements

The authors would like to acknowledge all participants taking part in the Check-In trial – both GPs and patients.

Thanks to Annette Kjær Ersbøll for supervision on the sample size calculations and Bjarne Laursen for supervision on the data management and for generated the randomization.

## References

1. World Health Organization. Global status report on noncommunicable diseases 2014. World Health Organization; 2014.
2. Wilson JM, Jungner YG. [Principles and practice of mass screening for disease]. *Bol Oficina Sanit Panam.* 1968;65(4):281-393.
3. Krogsboll LT, Jorgensen KJ, Gronhoj Larsen C, Gotzsche PC. General health checks in adults for reducing morbidity and mortality from disease. *Cochrane Database Syst Rev.* 2012;10:CD009009.
4. Sox HC. The health checkup: was it ever effective? Could it be effective? *JAMA.* 2013;309(23):2496-7.
5. Si S, Moss JR, Sullivan TR, Newton SS, Stocks NP. Effectiveness of general practice-based health checks: a systematic review and meta-analysis. *Br J Gen Pract.* 2014;64(618):e47-53.
6. Bjerregaard AL, Maindal HT, Bruun NH, Sandbaek A. Patterns of attendance to health checks in a municipality setting: the Danish 'Check Your Health Preventive Program'. *Prev Med Rep.* 2017;5:175-82.
7. Petter J, Reitsma-van Rooijen MM, Korevaar JC, Nielen MM. Willingness to participate in prevention programs for cardiometabolic diseases. *BMC Public Health.* 2015;15:44.
8. Bender AM, Jorgensen T, Helbech B, Linneberg A, Pisinger C. Socioeconomic position and participation in baseline and follow-up visits: the Inter99 study. *Eur J Prev Cardiol.* 2014;21(7):899-905.
9. Dryden R, Williams B, McCowan C, Themessl-Huber M. What do we know about who does and does not attend general health checks? Findings from a narrative scoping review. *BMC Public Health.* 2012;12:723.
10. Marmot M, Bell R. Fair society, healthy lives. *Public Health.* 2012;126 Suppl 1:S4-10.
11. Olsen GS, Holm AS, Jorgensen T, Borglykke A. Distribution of ideal cardiovascular health by educational levels from 1978 to 2006: a time trend study from the capital region of Denmark. *Eur J Prev Cardiol.* 2014;21(9):1145-52.
12. Pedersen KMS, J. . Det samarbejdende hospital: Almen praksis og kommuner. *Fremtidens Hospital.* København: Munksgaard; 2014. p. 115-26.

- 1  
2 13. Pedersen KM, Andersen JS, Sondergaard J. General practice and primary health care in Denmark. *J Am*  
3  
4 *Board Fam Med.* 2012;25 Suppl 1:S34-8.
- 5  
6 14. Andersen JS, Olivarius Nde F, Krasnik A. The Danish National Health Service Register. *Scand J Public*  
7  
8 *Health.* 2011;39(7 Suppl):34-7.
- 9  
10 15. Ware JE, Jr., Sherbourne CD. The MOS 36-item short-form health survey (SF-36). I. Conceptual  
11  
12 framework and item selection. *MedCare.* 1992;30(6):473-83.
- 13  
14 16. Jenkinson C, Layte R, Jenkinson D, Lawrence K, Petersen S, Paice C, et al. A shorter form health survey:  
15  
16 can the SF-12 replicate results from the SF-36 in longitudinal studies? *J Public Health Med.*  
17  
18 1997;19(2):179-86.
- 19  
20 17. Bandura A. *Self-efficacy: The Exercise of Control.* New York: W.H.Freeman; 1997 1997.
- 21  
22 18. Mikkelsen EG, Schwarzer R, Jerusalem M. Danish Version of the General Self-Efficacy Scale  
23  
24 <http://userpage.fu-berlin.de/health/danish.htm1999> [  
25  
26  
27  
28
- 29 19. Cohen S, Kamarck T, Mermelstein R. A global measure of perceived stress. *JHealth SocBehav.*  
30  
31 1983;24(4):385-96.
- 32  
33 20. World Health Organization. Recommended levels of physical activity for adults aged 18 - 64 years  
34  
35 [www.who.int](http://www.who.int): World Health Organization; 2017
- 36  
37 21. World Health Organization. Obesity and overweight [www.who.int](http://www.who.int): World Health Organization; 2017  
38  
39 [updated October 2017.
- 40  
41 22. Pedersen CB. The Danish Civil Registration System. *Scand J Public Health.* 2011;39(7 Suppl):22-5.
- 42  
43 23. Lynge E, Sandegaard JL, Rebolj M. The Danish National Patient Register. *Scand J Public Health.*  
44  
45 2011;39(7 Suppl):30-3.
- 46  
47 24. Kildemoes HW, Sorensen HT, Hallas J. The Danish National Prescription Registry. *Scand J Public Health.*  
48  
49 2011;39(7 Suppl):38-41.
- 50  
51 25. Helweg-Larsen K. The Danish Register of Causes of Death. *Scand J Public Health.* 2011;39(7 Suppl):26-9.
- 52  
53 26. Houe H. EAK, Toft N. Sample size and sampling methods. In: Houe H. EAK, Toft N., editor. *Introduction*  
54  
55 *to veterinary epidemiology*2004.
- 56  
57 27. Statens Institut for Folkesundhed., Sundhedsstyrelsen. *Sundhedsprofil2010.dk.* 2013.
- 58  
59  
60

- 1
  - 2
  - 3
  - 4
  - 5
  - 6
  - 7
  - 8
  - 9
  - 10
  - 11
  - 12
  - 13
  - 14
  - 15
  - 16
  - 17
  - 18
  - 19
  - 20
  - 21
  - 22
  - 23
  - 24
  - 25
  - 26
  - 27
  - 28
  - 29
  - 30
  - 31
  - 32
  - 33
  - 34
  - 35
  - 36
  - 37
  - 38
  - 39
  - 40
  - 41
  - 42
  - 43
  - 44
  - 45
  - 46
  - 47
  - 48
  - 49
  - 50
  - 51
  - 52
  - 53
  - 54
  - 55
  - 56
  - 57
  - 58
  - 59
  - 60
28. Pisinger CH. Behandling af tobaksafhængighed - Anbefalinger til en styrket klinisk praksis. 2011 2011.
29. Moher D, Hopewell S, Schulz KF, Montori V, Gotzsche PC, Devereaux PJ, et al. CONSORT 2010 explanation and elaboration: updated guidelines for reporting parallel group randomised trials. *BMJ*. 2010;340:c869.
30. Spratt M, Carpenter J, Sterne JA, Carlin JB, Heron J, Henderson J, et al. Strategies for multiple imputation in longitudinal studies. *Am J Epidemiol*. 2010;172(4):478-87.
31. Merlo J, Chaix B, Ohlsson H, Beckman A, Johnell K, Hjerpe P, et al. A brief conceptual tutorial of multilevel analysis in social epidemiology: using measures of clustering in multilevel logistic regression to investigate contextual phenomena. *J Epidemiol Community Health*. 2006;60(4):290-7.
32. Jensen HAR, Davidsen, M., Ekholm, O., Christensen, A.I. Danskernes sundhed - Den nationale sundhedsprofil 2017. Sundhedsstyrelsen; 2018.
33. Pisinger C, Vestbo J, Borch-Johnsen K, Jorgensen T. Smoking cessation intervention in a large randomised population-based study. The Inter99 study. *Prev Med*. 2005;40(3):285-92.
34. Andersen PT, Jensen JJ. Healthcare reform in Denmark. *Scand J Public Health*. 2010;38(3):246-52.
35. Wood DA, Kotseva K, Connolly S, Jennings C, Mead A, Jones J, et al. Nurse-coordinated multidisciplinary, family-based cardiovascular disease prevention programme (EUROACTION) for patients with coronary heart disease and asymptomatic individuals at high risk of cardiovascular disease: a paired, cluster-randomised controlled trial. *Lancet*. 2008;371(9629):1999-2012.
36. Geyti C, Maindal HT, Dalsgaard EM, Christensen KS, Sandbaek A. Mental health assessment in health checks of participants aged 30-49 years: A large-scale cohort study. *Prev Med Rep*. 2018;9:72-9.
37. Devroey D, Coigniez P, Vandevoorde J, Kartounian J, Betz W. Prevention and follow-up of cardiovascular disease among patients without a personal GP. *Fam Pract*. 2003;20(4):420-4.



Table 1: Baseline characteristics for participants with low socioeconomic position allocated to a preventive health check at the general practitioner (Check-In) or to usual care. Values are number (percentages) unless stated otherwise.

|                                                                                        | Check-In group<br>(n=549) | Usual care group<br>(n=555) |
|----------------------------------------------------------------------------------------|---------------------------|-----------------------------|
| <b>Demographic and socioeconomic characteristics</b>                                   |                           |                             |
| Age, years [median (IQR#)]                                                             | 54 (49;59)                | 54 (49;59)                  |
| Men                                                                                    | 282 (51)                  | 293 (53)                    |
| Danish/other Western ethnic background                                                 | 437 (79)                  | 446 (81)                    |
| Married/cohabitant                                                                     | 279 (51)                  | 270 (49)                    |
| Children living at home                                                                | 137 (25)                  | 134 (24)                    |
| Employment status                                                                      |                           |                             |
| Employed                                                                               | 269 (49)                  | 266 (48)                    |
| Unemployed/social security                                                             | 224 (41)                  | 239 (43)                    |
| Retired/other                                                                          | 56 (10)                   | 49 (9)                      |
| <b>Health behaviour</b>                                                                |                           |                             |
| Cigarette smoking                                                                      |                           |                             |
| Daily smoker                                                                           | 228 (42)                  | 225 (41)                    |
| Occasional and ex-smoker                                                               | 156 (28)                  | 163 (29)                    |
| Never smoker                                                                           | 156 (29)                  | 163 (30)                    |
| Cigarettes/day*, [median (IQR#)]                                                       | 18 (10;20)                | 20 (10;20)                  |
| Current non-drinkers                                                                   | 171 (32)                  | 174 (32)                    |
| Drinks/week <sup>‡</sup> , [median (IQR#)]                                             | 6 (3; 15)                 | 6 (2; 16)                   |
| Binge drinking at least weekly                                                         | 94 (17)                   | 110 (20)                    |
| Physical inactivity <sup>§</sup>                                                       | 268 (49)                  | 286 (52)                    |
| BMI (kg/m <sup>2</sup> ), [median (IQR#)]                                              | 25.9 (23.1;29.1)          | 26.2 (23.4;29.7)            |
| Obese (BMI ≥ 30 kg/m <sup>2</sup> )                                                    | 104 (20)                  | 124 (23)                    |
| Self-rated bad to very bad health                                                      | 213 (39)                  | 225 (41)                    |
| Self-efficacy, [median (IQR#)]                                                         | 29 (24;33)                | 29 (24;33)                  |
| <b>Morbidity and contact with GP</b>                                                   |                           |                             |
| Non-communicable diseases                                                              |                           |                             |
| Any chronic condition                                                                  | 337 (61)                  | 359 (65)                    |
| Hypertension                                                                           | 118 (22)                  | 133 (24)                    |
| Hypercholesterolemia                                                                   | 97 (18)                   | 99 (18)                     |
| COPD                                                                                   | 124 (23)                  | 127 (23)                    |
| Diabetes                                                                               | 175 (32)                  | 191 (34)                    |
| Hypothyroidism                                                                         | 55 (10)                   | 44 (8)                      |
| Hyperthyroidism                                                                        | 24 (4)                    | 22 (4)                      |
| Depression                                                                             | 79 (15)                   | 81 (15)                     |
| Number of non-communicable diseases                                                    |                           |                             |
| 0                                                                                      | 212 (39)                  | 196 (35)                    |
| 1                                                                                      | 147 (27)                  | 149 (27)                    |
| 2                                                                                      | 93 (17)                   | 112 (20)                    |
| ≥3                                                                                     | 97 (18)                   | 98 (18)                     |
| Contact with GP within the last year                                                   | 495 (90)                  | 480 (87)                    |
| Number of contacts with the GP within the last year <sup>&amp;</sup> , [median (IQR#)] | 7 (4;13)                  | 8 (4;14)                    |

#Interquartile range; \*among daily smokers; <sup>‡</sup>among those who drink alcohol; <sup>&</sup>among those who visit their GP within the last year; <sup>§</sup>less than 150 minutes of moderate-intensity physical activity.

Table 2: Effectiveness of Check-In on smoking status (primary outcome) and other health behaviour at 12-months follow-up measured as dichotomized outcomes. Values are number (percentages), ORs and *p* values for the intervention effectiveness. The analyses are performed as per protocol and ITT with multiple imputation.

| Dichotomies outcomes                | n (%)                        |                                | Effectiveness<br>(Check-In vs Usual care) |                |
|-------------------------------------|------------------------------|--------------------------------|-------------------------------------------|----------------|
|                                     | Check-In<br>group<br>(n=549) | Usual care<br>group<br>(n=555) | OR (95% CI)                               | <i>P</i> value |
| <b>Primary outcome</b>              |                              |                                |                                           |                |
| Daily smokers                       |                              |                                |                                           |                |
| Per protocol, n=710                 | 94 (31)                      | 147 (36)                       | 0.80 (0.58-1.09)                          | 0.16           |
| ITT; multiple imputation            | 203 (37)                     | 205 (37)                       | 0.99 (0.76-1.30)                          | 0.95           |
| <b>Secondary outcomes</b>           |                              |                                |                                           |                |
| Binge drinking ≥ weekly             |                              |                                |                                           |                |
| Per protocol, n=718                 | 55 (18)                      | 84 (20)                        | 0.87 (0.60-1.27)                          | 0.48           |
| ITT; multiple imputation            | 98 (18)                      | 116 (21)                       | 0.82 (0.59-1.14)                          | 0.24           |
| Physical inactivity (<150 min/week) |                              |                                |                                           |                |
| Per protocol, n=721                 | 132 (43)                     | 186 (45)                       | 0.92 (0.68-1.23)                          | 0.56           |
| ITT; multiple imputation            | 252 (46)                     | 260 (47)                       | 0.97 (0.74-1.27)                          | 0.84           |
| Obese (BMI ≥ 30 kg/m <sup>2</sup> ) |                              |                                |                                           |                |
| Per protocol, n=684                 | 68 (23)                      | 90 (23)                        | 1.01 (0.71-1.45)                          | 0.95           |
| ITT; multiple imputation            | 131 (24)                     | 122 (22)                       | 0.90 (0.67-1.21)                          | 0.93           |

Table 3: Effectiveness of Check-In on health behaviour measured as continuous outcomes at 12-months follow-up measured as continuous outcomes. Values are medians for Check-In and usual care group and *p* values for the Rank-sum test. The analyses are performed as per protocol and ITT with multiple imputation.

| Continuous outcomes          | Median (IQR)           |                          | P value           |
|------------------------------|------------------------|--------------------------|-------------------|
|                              | Check-In group (n=549) | Usual care group (n=555) | Median regression |
| Cigarettes/day <sup>#</sup>  |                        |                          |                   |
| Per protocol, n=239          | 17 (14;20)             | 15 (10;20)               | 0.35              |
| ITT; multiple imputation     | 15 (7;20)              | 15 (7;20)                | 0.99              |
| Drinks/week <sup>&amp;</sup> |                        |                          |                   |
| Per protocol, n=419          | 7 (4;19)               | 8 (4;17)                 | 0.38              |
| ITT; multiple imputation     | 7 (4;17)               | 7 (4;15)                 | 0.95              |
| BMI                          |                        |                          |                   |
| Per protocol, n=684          | 25.9 (23.5;29.7)       | 26.4 (23.8;29.6)         | 0.19              |
| ITT; multiple imputation     | 25.9 (23.2;29.4)       | 26.4 (23.6;29.8)         | 0.11              |

<sup>#</sup>Among daily smokers; <sup>&</sup>among those who drink alcohol

Table 4: Effectiveness of Check-In on incidence of chronic obstructive pulmonary disease, diabetes, disorder of the thyroid gland, hypertension and hypercholesterolemia. The analyses are performed per protocol and as ITT.

|                                        | n (%)             |                     | Effectiveness<br>(Check-In vs Usual care) |         |
|----------------------------------------|-------------------|---------------------|-------------------------------------------|---------|
|                                        | Check-In<br>group | Usual care<br>group | OR (95% CI)                               | p value |
| Any new chronic condition <sup>#</sup> |                   |                     |                                           |         |
| Per protocol, n=919                    | 82 (23)           | 120 (22)            | 1.05 (0.77-1.45)                          | 0.75    |
| ITT, n=1104                            | 125 (23)          | 120 (22)            | 1.07 (0.80-1.42)                          | 0.65    |
| Hypertension                           |                   |                     |                                           |         |
| Per protocol, n=704                    | 40 (14)           | 60 (14)             | 1.01 (0.66-1.56)                          | 0.96    |
| ITT, n=856                             | 55 (13)           | 60 (14)             | 0.88 (0.60-1.31)                          | 0.54    |
| Hypercholesterolemia                   |                   |                     |                                           |         |
| Per protocol, n=752                    | 13 (4)            | 20 (4)              | 1.00 (0.49-2.05)                          | 0.99    |
| ITT, n=908                             | 18 (4)            | 20 (4)              | 0.90 (0.47-1.73)                          | 0.76    |
| Chronic Obstructive Pulmonary Disease  |                   |                     |                                           |         |
| Per protocol, n=711                    | 19 (7)            | 23 (5)              | 1.24 (0.66-2.31)                          | 0.51    |
| ITT, n=844                             | 32 (8)            | 23 (5)              | 1.44 (0.83-2.50)                          | 0.20    |
| Diabetes mellitus                      |                   |                     |                                           |         |
| Per protocol, n=604                    | 8 (3)             | 15 (4)              | 0.74 (0.31-1.76)                          | 0.49    |
| ITT, n=720                             | 14 (4)            | 15 (4)              | 0.89 (0.42-1.87)                          | 0.76    |
| Hypothyroidism <sup>‡</sup>            |                   |                     |                                           |         |
| Per protocol, n=919                    | -                 | -                   | -                                         | -       |
| ITT, n=840                             | -                 | -                   | -                                         | -       |
| Hyperthyroidism <sup>‡</sup>           |                   |                     |                                           |         |
| Per protocol, n=878                    | -                 | -                   | -                                         | -       |
| ITT, n=1051                            | -                 | -                   | -                                         | -       |
| Depression                             |                   |                     |                                           |         |
| Per protocol, n=789                    | 12 (4)            | 9 (2)               | 2.05 (0.85-4.91)                          | 0.11    |
| ITT, n=944                             | 25 (5)            | 9 (2)               | 2.90 (1.34-6.29)                          | 0.007   |

<sup>#</sup>Hypertension if no hypertension at baseline, hypercholesterolemia if no hypercholesterolemia at baseline, COPD if no COPD at baseline, diabetes if no diabetes at baseline, hypothyroidism if no hypothyroidism at baseline, hyperthyroidism if no hyperthyroidism at baseline or depression if no depression at baseline

<sup>‡</sup>Too few in each group to report for ethical reasons

Figure 1: CONSORT flow diagram of recruitment and participation in Check-In

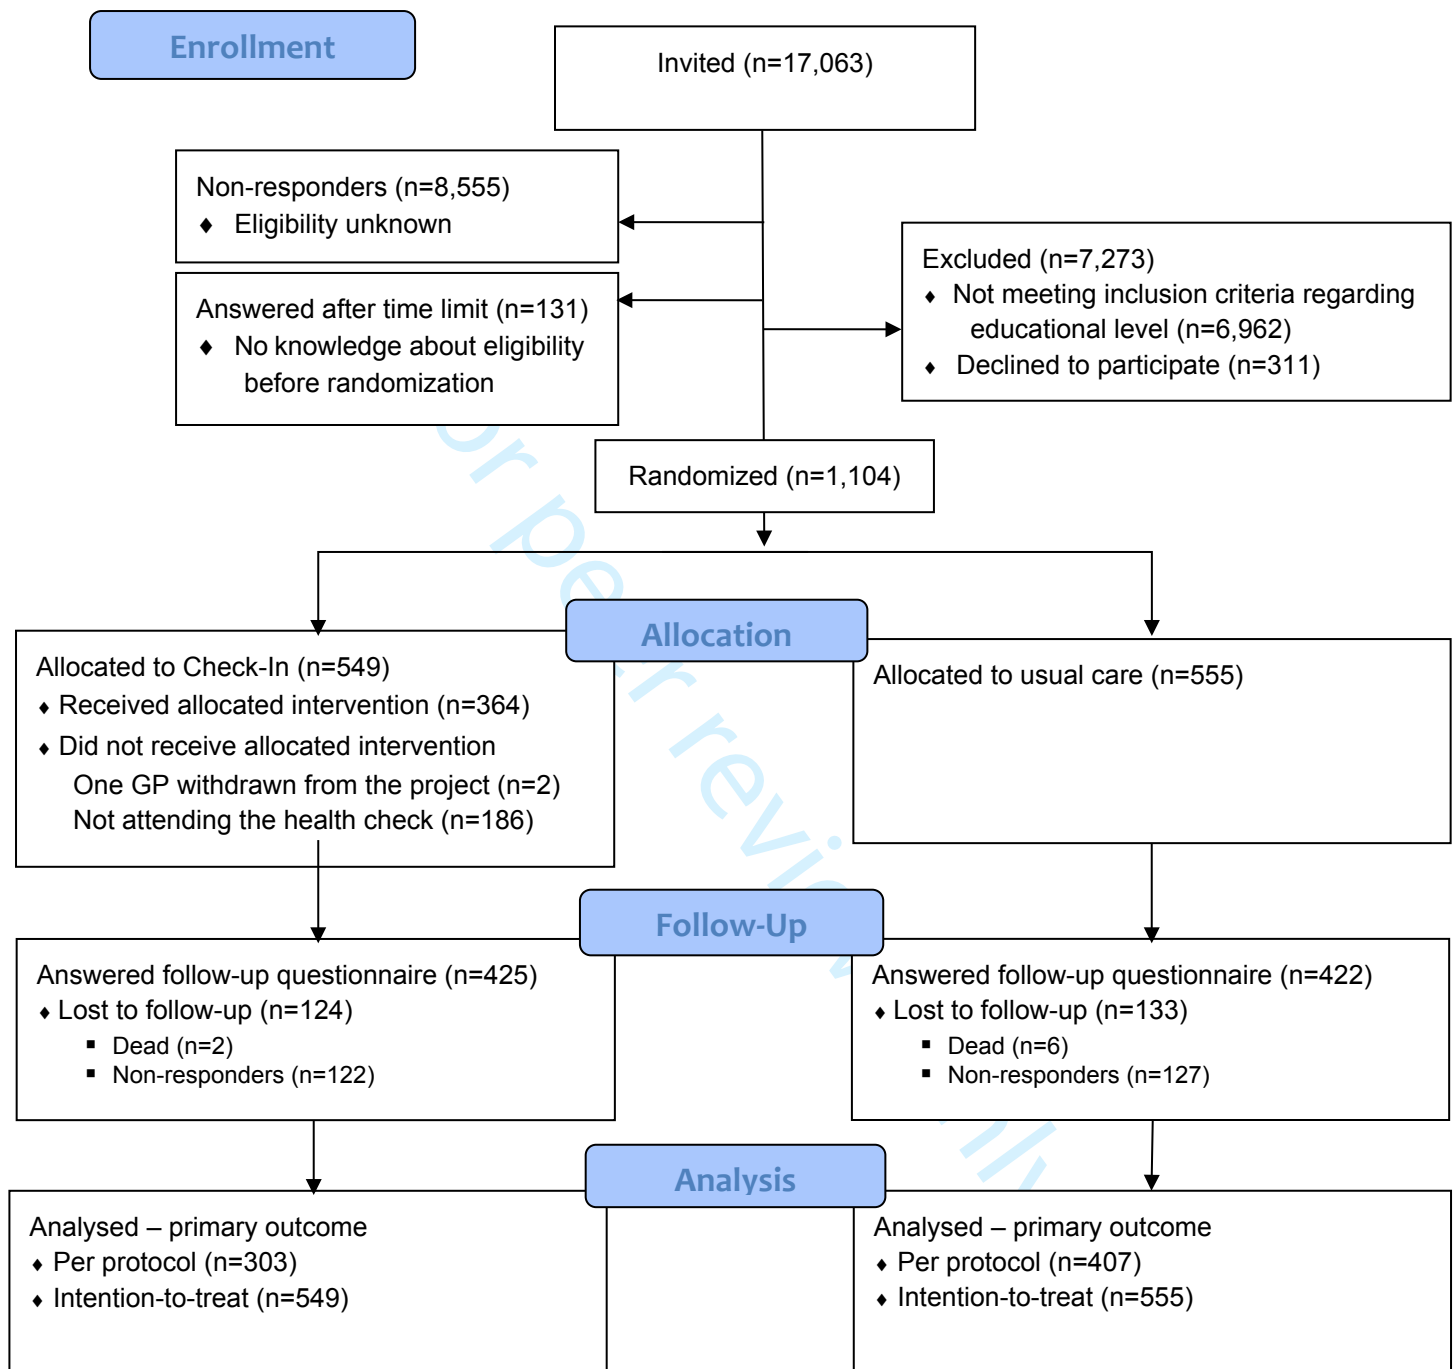

1  
2  
3  
4 Example of the study-specific electronic data interchange (EDI) message to the GP, computed based on the patient-  
5 reported questionnaire, including summarized scores and categorization of items – and showing the different options.  
6 Translated from the Danish version used in the intervention  
7

8  
9 *Sender:* DAK-E

10  
11 *Headline:* Results from patient-reported factors

12  
13 *Overall result:* the patient has an overall increased risk of developing a chronic disease / the patient is at no risk of a  
14 chronic disease

15 *School and educational level:* the patient has basic/upper secondary school level and no education/special  
16 worker/vocational education/short education/medium education/long/other/missing.

17  
18 *Social:* The patient lives alone/with partner; with children living at home/without children living at home

19  
20 *Weight (kilograms):*

21  
22 *BMI:* < 18.5 underweight / 18.5-24.9 normal weight / 25-30 overweight / >30 obese

23  
24 *Smoker status:* Daily smoker/occasional smoker/ex-smoker/never

25  
26 *Cigarettes per day:*

27  
28 *COPD risk score:* Score 0-4 dyspnoea is not caused by COPD / score 5-10 dyspnoea is probably caused by COPD

29  
30 *Alcohol consumption per week (number of units):*

31  
32 *Frequency of binge-drinking:* daily/weekly/monthly/rarely/never

33  
34 *Follows the Danish Health Authority recommendations for alcohol consumption:* yes/no

35  
36 *Diet score:* 0-4 unhealthy dietary habits / 5-8 dietary habits can be improved / 9-12 healthy dietary habits

37  
38 *Specification of diet:* high intake of sugar/low intake of fruit and berries/low intake of vegetables and root crops/low  
39 intake of fish and seafood.

40  
41 *Physical activity (minutes per week):*

42  
43 *Follows the Danish Health Authority recommendations of 150 minutes of physical activity per week:* yes/no

44  
45 *Specification:* low physical training/low everyday exercise

46  
47 *Diseases in the near family:* hypertension/hypercholesterolemia/blood clots in the heart/blood clots in the  
48 brain/blood clots in the lungs or legs/type-1 diabetes mellitus/T2DM/COPD/don't know/none

49  
50 *Self-rated health:* excellent/very good/good/bad/very bad

51  
52 *Confidence in own ability to act (self-efficacy):* the patient has under/over average confidence in own ability to act

53  
54 *Stress level:* not high stress level/high stress level (high stress level = stress level  $\geq 15$  for men and stress level  $\geq 17$  for  
55 women)  
56  
57  
58  
59  
60

1  
2  
3  
4  
5  
6  
7  
8  
9  
10  
11  
12  
13  
14  
15  
16  
17  
18  
19  
20  
21  
22  
23  
24  
25  
26  
27  
28  
29  
30  
31  
32  
33  
34  
35  
36  
37  
38  
39  
40  
41  
42  
43  
44  
45  
46  
47  
48  
49  
50  
51  
52  
53  
54  
55  
56  
57  
58  
59  
60

Assessment specification of primary outcome (smoking status) and secondary outcomes (other patient-reported health behaviour)

| Outcome                          | Items                                                                                                                                                                                                                   | Response categories                                                                                                                                                                                                                                                                                                               |
|----------------------------------|-------------------------------------------------------------------------------------------------------------------------------------------------------------------------------------------------------------------------|-----------------------------------------------------------------------------------------------------------------------------------------------------------------------------------------------------------------------------------------------------------------------------------------------------------------------------------|
| <b>Smoking (primary outcome)</b> | <i>"Do you smoke?"</i>                                                                                                                                                                                                  | <ol style="list-style-type: none"> <li>1. "Yes, daily"</li> <li>2. "Yes, I smoke occasionally"</li> <li>3. "No, I stopped less than six months ago"</li> <li>4. "No, I stopped more than six months ago"</li> <li>5. "No, I have never smoked"</li> </ol>                                                                         |
|                                  | <i>"How much do you approximately smoke each day? / How much did you approximately smoke at the time you smoked?"</i>                                                                                                   | Number of cigarettes per day: ____<br>Number of cheroots per day: ____<br>Number of cigars per day: ____<br>Number of pipe stops per day: ____                                                                                                                                                                                    |
| <b>Alcohol</b>                   | <i>"Do you drink alcohol?"</i>                                                                                                                                                                                          | <ol style="list-style-type: none"> <li>1. "Yes"</li> <li>2. "No, never"</li> </ol>                                                                                                                                                                                                                                                |
|                                  | <i>"How many units of alcohol do you typically drink each day during the week?"</i>                                                                                                                                     | For each day in the week note:<br>Units of beer:<br>Units of wine:<br>Units of liquor:                                                                                                                                                                                                                                            |
|                                  | <i>"How often do you drink more than five units of alcohol on the same occasion?"</i>                                                                                                                                   | <ol style="list-style-type: none"> <li>1. "Daily or almost daily"</li> <li>2. "Weekly"</li> <li>3. "Monthly"</li> <li>4. "Rarely"</li> <li>5. "Never"</li> </ol>                                                                                                                                                                  |
| <b>Physical activity</b>         | <i>"For how many hours during a week do you perform exercise that makes you short of breath (e.g. running, soccer, aerobics, tennis, jogging or similar)?"</i>                                                          | <ol style="list-style-type: none"> <li>1. "0 minutes"</li> <li>2. "Less than 30 minutes"</li> <li>3. "30-60 minutes (½-1 hour)"</li> <li>4. "60-120 minutes (1-2 hours)"</li> <li>5. "More than 120 minutes (more than 2 hours)"</li> </ol>                                                                                       |
|                                  | <i>"For how many hours during a week do you perform light exercise? / How much time during the week do you spend on everyday exercise (e.g. a walk, easy gardening, cleaning, biking to and from work or similar)?"</i> | <ol style="list-style-type: none"> <li>1. "0 minutes"</li> <li>2. "Less than 30 minutes"</li> <li>3. "30-60 minutes (½-1 hour)"</li> <li>4. "60-90 minutes (1-1½ hours)"</li> <li>5. "90-150 minutes (1½-2½ hours)"</li> <li>6. "150-300 minutes (2½-5 hours)"</li> <li>7. "More than 300 minutes (more than 5 hours)"</li> </ol> |
| <b>BMI</b>                       | BMI is generated from these two items:<br><i>"What is your height? (in centimetres)"</i><br><i>"What is your weight? (in kilos)"</i>                                                                                    | $BMI = \frac{\text{weight in kilos}}{(\text{height in metres})^2}$                                                                                                                                                                                                                                                                |

## Algorithms used to define the metabolic risk factors and NCDs

| Condition                             | ICD-10 codes from the Danish National Patient Register | ATC-codes from the Danish National Prescription Registry                                                                                            | Definition                                                                                                                                                                    |
|---------------------------------------|--------------------------------------------------------|-----------------------------------------------------------------------------------------------------------------------------------------------------|-------------------------------------------------------------------------------------------------------------------------------------------------------------------------------|
| Hypertension                          | I11, I12, I13, I15                                     | C07B, C03A, C03B, C03E, C03X; or C03C, C03D, C07A, C09 if person does not have ICD I20, I21, I25.1, I50; or C08 if person does not have ICD I20-25# | Diagnosis and/or medicine C07B, C03A, C03B, C03E, C03X; or C03C, C03D, C07A, C09 if person does not have ICD I20, I21, I25.1, I50; or C08 if person does not have ICD I20-25# |
| Hypercholesterolemia                  |                                                        | C10                                                                                                                                                 | Medicine                                                                                                                                                                      |
| Chronic Obstructive Pulmonary Disease | J44                                                    | R03                                                                                                                                                 | Diagnose and/or medicine                                                                                                                                                      |
| Diabetes mellitus                     | E10, E11, E12, E13, E14                                | A10                                                                                                                                                 | Diagnosis and/or medicine                                                                                                                                                     |
| Hypothyroidism                        | E02, E03, E063                                         | H03AA01                                                                                                                                             | Diagnosis and/or medicine                                                                                                                                                     |
| Hyperthyroidism                       | E05, E062                                              | H03B                                                                                                                                                | Diagnosis and/or medicine                                                                                                                                                     |
| Depression                            | F32, F33                                               | N06A                                                                                                                                                | Diagnosis and/or medicine                                                                                                                                                     |

# to exclude treatment for underlying heart disease



1  
2  
3  
4  
5  
6  
7  
8  
9  
10  
11  
12  
13  
14  
15  
16  
17  
18  
19  
20  
21  
22  
23  
24  
25  
26  
27  
28  
29  
30  
31  
32  
33  
34  
35  
36  
37  
38  
39  
40  
41  
42  
43  
44  
45  
46  
47  
48  
49  
50  
51  
52  
53  
54  
55  
56  
57  
58  
59  
60

Effectiveness of Check-In on prevalence of non-communicable diseases at 12-month follow-up. The analyses are performed per protocol and as ITT

|                                       | n (%)             |                     | Effectiveness<br>(Check-In vs Usual care) |         |
|---------------------------------------|-------------------|---------------------|-------------------------------------------|---------|
|                                       | Check-In<br>group | Usual care<br>group | OR (95% CI)                               | p value |
| Any chronic condition <sup>#</sup>    |                   |                     |                                           |         |
| Per protocol, n=919                   | 202 (56)          | 306 (55)            | 1.01 (0.78-1.32)                          | 0.92    |
| ITT, n=1104                           | 296 (54)          | 306 (55)            | 0.93 (0.75-1.21)                          | 0.68    |
| Hypertension                          |                   |                     |                                           |         |
| Per protocol, n=919                   | 111 (30)          | 172 (31)            | 0.98 (0.73-1.30)                          | 0.87    |
| ITT, n=1104                           | 154 (28)          | 172 (31)            | 0.87 (0.67-1.12)                          | 0.28    |
| Hypercholesterolemia                  |                   |                     |                                           |         |
| Per protocol, n=919                   | 77 (21)           | 113 (20)            | 1.05 (0.76-1.45)                          | 0.77    |
| ITT, n=1104                           | 106 (19)          | 113 (20)            | 0.94 (0.70-1.26)                          | 0.66    |
| Chronic Obstructive Pulmonary Disease |                   |                     |                                           |         |
| Per protocol, n=919                   | 59 (16)           | 81 (15)             | 1.13 (0.79-1.63)                          | 0.51    |
| ITT, n=1104                           | 91 (17)           | 81 (15)             | 1.16 (0.84-1.61)                          | 0.36    |
| Diabetes mellitus                     |                   |                     |                                           |         |
| Per protocol, n=919                   | 57 (16)           | 83 (15)             | 1.06 (0.73-1.52)                          | 0.77    |
| ITT, n=1104                           | 87 (16)           | 83 (15)             | 1.07 (0.77-1.49)                          | 0.68    |
| Hypothyroidism                        |                   |                     |                                           |         |
| Per protocol, n=919                   | 19 (5)            | 26 (5)              | 1.12 (0.61-2.06)                          | 0.71    |
| ITT, n=1104                           | 29 (5)            | 26 (5)              | 1.13 (0.65-1.95)                          | 0.65    |
| Hyperthyroidism <sup>‡</sup>          |                   |                     |                                           |         |
| Per protocol, n=919                   | -                 | -                   | -                                         | -       |
| ITT, n=1104                           | -                 | -                   | -                                         | -       |
| Depression                            |                   |                     |                                           |         |
| Per protocol, n=919                   | 48 (13)           | 71 (13)             | 1.04 (0.70-1.53)                          | 0.86    |
| ITT, n=1104                           | 80 (15)           | 71 (13)             | 1.16 (0.82-1.64)                          | 0.39    |

<sup>#</sup>Hypertension, hypercholesterolemia, COPD, diabetes, hypothyroidism, hyperthyroidism or depression

<sup>‡</sup>Too few in each group to report for ethical reasons

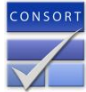

## CONSORT 2010 checklist of information to include when reporting a randomised trial\*

| Section/Topic                    | Item No | Checklist item                                                                                                                                                                              | Reported on page No |
|----------------------------------|---------|---------------------------------------------------------------------------------------------------------------------------------------------------------------------------------------------|---------------------|
| <b>Title and abstract</b>        |         |                                                                                                                                                                                             |                     |
|                                  | 1a      | Identification as a randomised trial in the title                                                                                                                                           | 1                   |
|                                  | 1b      | Structured summary of trial design, methods, results, and conclusions (for specific guidance see CONSORT for abstracts)                                                                     | 2, 3                |
| <b>Introduction</b>              |         |                                                                                                                                                                                             |                     |
| Background and objectives        | 2a      | Scientific background and explanation of rationale                                                                                                                                          | 4, 5                |
|                                  | 2b      | Specific objectives or hypotheses                                                                                                                                                           | 5                   |
| <b>Methods</b>                   |         |                                                                                                                                                                                             |                     |
| Trial design                     | 3a      | Description of trial design (such as parallel, factorial) including allocation ratio                                                                                                        | 5                   |
|                                  | 3b      | Important changes to methods after trial commencement (such as eligibility criteria), with reasons                                                                                          | None                |
| Participants                     | 4a      | Eligibility criteria for participants                                                                                                                                                       | 6                   |
|                                  | 4b      | Settings and locations where the data were collected                                                                                                                                        | 5, 7, 8, 9          |
| Interventions                    | 5       | The interventions for each group with sufficient details to allow replication, including how and when they were actually administered                                                       | 6, 7                |
| Outcomes                         | 6a      | Completely defined pre-specified primary and secondary outcome measures, including how and when they were assessed                                                                          | 8, 9                |
|                                  | 6b      | Any changes to trial outcomes after the trial commenced, with reasons                                                                                                                       | None                |
| Sample size                      | 7a      | How sample size was determined                                                                                                                                                              | 9, 10               |
|                                  | 7b      | When applicable, explanation of any interim analyses and stopping guidelines                                                                                                                | None                |
| <b>Randomisation:</b>            |         |                                                                                                                                                                                             |                     |
| Sequence generation              | 8a      | Method used to generate the random allocation sequence                                                                                                                                      | 6                   |
|                                  | 8b      | Type of randomisation; details of any restriction (such as blocking and block size)                                                                                                         | 6                   |
| Allocation concealment mechanism | 9       | Mechanism used to implement the random allocation sequence (such as sequentially numbered containers), describing any steps taken to conceal the sequence until interventions were assigned | 6                   |
| Implementation                   | 10      | Who generated the random allocation sequence, who enrolled participants, and who assigned participants to interventions                                                                     | 6, 7                |
| Blinding                         | 11a     | If done, who was blinded after assignment to interventions (for example, participants, care providers, those                                                                                |                     |

|                                                      |     |                                                                                                                                                   |                      |
|------------------------------------------------------|-----|---------------------------------------------------------------------------------------------------------------------------------------------------|----------------------|
|                                                      |     | assessing outcomes) and how                                                                                                                       | 6                    |
|                                                      | 11b | If relevant, description of the similarity of interventions                                                                                       | Not relevant         |
| Statistical methods                                  | 12a | Statistical methods used to compare groups for primary and secondary outcomes                                                                     | 10, 11               |
|                                                      | 12b | Methods for additional analyses, such as subgroup analyses and adjusted analyses                                                                  | 11                   |
| <b>Results</b>                                       |     |                                                                                                                                                   |                      |
| Participant flow (a diagram is strongly recommended) | 13a | For each group, the numbers of participants who were randomly assigned, received intended treatment, and were analysed for the primary outcome    | Figure 1             |
|                                                      | 13b | For each group, losses and exclusions after randomisation, together with reasons                                                                  | Figure 1             |
| Recruitment                                          | 14a | Dates defining the periods of recruitment and follow-up                                                                                           | 5                    |
|                                                      | 14b | Why the trial ended or was stopped                                                                                                                | 5                    |
| Baseline data                                        | 15  | A table showing baseline demographic and clinical characteristics for each group                                                                  | Table 1              |
| Numbers analysed                                     | 16  | For each group, number of participants (denominator) included in each analysis and whether the analysis was by original assigned groups           | Table 2-4            |
| Outcomes and estimation                              | 17a | For each primary and secondary outcome, results for each group, and the estimated effect size and its precision (such as 95% confidence interval) | Table 2-4            |
|                                                      | 17b | For binary outcomes, presentation of both absolute and relative effect sizes is recommended                                                       | Table 2, 4           |
| Ancillary analyses                                   | 18  | Results of any other analyses performed, including subgroup analyses and adjusted analyses, distinguishing pre-specified from exploratory         | 13 and supplementary |
| Harms                                                | 19  | All important harms or unintended effects in each group (for specific guidance see CONSORT for harms)                                             | 13                   |
| <b>Discussion</b>                                    |     |                                                                                                                                                   |                      |
| Limitations                                          | 20  | Trial limitations, addressing sources of potential bias, imprecision, and, if relevant, multiplicity of analyses                                  | 15, 16               |
| Generalisability                                     | 21  | Generalisability (external validity, applicability) of the trial findings                                                                         | 16                   |
| Interpretation                                       | 22  | Interpretation consistent with results, balancing benefits and harms, and considering other relevant evidence                                     | 14, 16               |
| <b>Other information</b>                             |     |                                                                                                                                                   |                      |
| Registration                                         | 23  | Registration number and name of trial registry                                                                                                    | 18                   |
| Protocol                                             | 24  | Where the full trial protocol can be accessed, if available                                                                                       | Not published        |
| Funding                                              | 25  | Sources of funding and other support (such as supply of drugs), role of funders                                                                   | 19                   |

\*We strongly recommend reading this statement in conjunction with the CONSORT 2010 Explanation and Elaboration for important clarifications on all the items. If relevant, we also recommend reading CONSORT extensions for cluster randomised trials, non-inferiority and equivalence trials, non-pharmacological treatments, herbal interventions, and pragmatic trials. Additional extensions are forthcoming: for those and for up to date references relevant to this checklist, see [www.consort-statement.org](http://www.consort-statement.org).

# BMJ Open

## The effectiveness of general practice-based health checks on health behaviour and incidence on non-communicable diseases in individuals with low socioeconomic position: a randomised controlled trial in Denmark

|                                 |                                                                                                                                                                                                                                                                                                                                                                                                                                                                                                                                                                                                                                                                                                                                              |
|---------------------------------|----------------------------------------------------------------------------------------------------------------------------------------------------------------------------------------------------------------------------------------------------------------------------------------------------------------------------------------------------------------------------------------------------------------------------------------------------------------------------------------------------------------------------------------------------------------------------------------------------------------------------------------------------------------------------------------------------------------------------------------------|
| Journal:                        | <i>BMJ Open</i>                                                                                                                                                                                                                                                                                                                                                                                                                                                                                                                                                                                                                                                                                                                              |
| Manuscript ID                   | bmjopen-2019-029180.R1                                                                                                                                                                                                                                                                                                                                                                                                                                                                                                                                                                                                                                                                                                                       |
| Article Type:                   | Research                                                                                                                                                                                                                                                                                                                                                                                                                                                                                                                                                                                                                                                                                                                                     |
| Date Submitted by the Author:   | 09-Aug-2019                                                                                                                                                                                                                                                                                                                                                                                                                                                                                                                                                                                                                                                                                                                                  |
| Complete List of Authors:       | Kamstrup-Larsen, Nina; National Institute of Public Health Dalton, Susanne; Danish Cancer Society, Department of Psychosocial Cancer Research, Institute of Cancer Epidemiology Grønbæk, Morten; University of Southern Denmark, National Institute of Public Health Broholm-Jørgensen, Marie; National Institute of Public Health Thomsen, Janus Laust; Research Unit for General Practice, Department of Clinical Medicine; Aalborg University Hospital Larsen, Lars; Syddansk Universitet, Research Unit of General Practice Johansen, Christoffer; Danish Cancer Society, Department of Psychosocial Cancer Research, Institute of Cancer Epidemiology Tolstrup, Janne; National Institute of Public Health, Centre for Alcohol Research |
| <b>Primary Subject Heading</b>: | Public health                                                                                                                                                                                                                                                                                                                                                                                                                                                                                                                                                                                                                                                                                                                                |
| Secondary Subject Heading:      | General practice / Family practice, Health services research                                                                                                                                                                                                                                                                                                                                                                                                                                                                                                                                                                                                                                                                                 |
| Keywords:                       | General practitioner, Health check, PREVENTIVE MEDICINE, SOCIAL MEDICINE, Randomized controlled trial                                                                                                                                                                                                                                                                                                                                                                                                                                                                                                                                                                                                                                        |
|                                 |                                                                                                                                                                                                                                                                                                                                                                                                                                                                                                                                                                                                                                                                                                                                              |

SCHOLARONE™  
Manuscripts

1  
2  
3  
4 **The effectiveness of general practice-based health checks on health behaviour and incidence on non-**  
5 **communicable diseases in individuals with low socioeconomic position: a randomised controlled trial in**  
6  
7  
8 **Denmark**  
9

10  
11  
12  
13  
14  
15 Nina Kamstrup-Larsen, PhD Student<sup>1</sup>, Susanne Oksbjerg Dalton, Senior Researcher and Group Leader<sup>2</sup>,  
16  
17 Morten Grønbaek, Director<sup>1</sup>, Marie Broholm-Jørgensen, Postdoc<sup>1</sup>, Janus Laust Thomsen, Clinical Professor<sup>3</sup>,  
18  
19 Lars Bruun Larsen, Postdoc<sup>4</sup>, Christoffer Johansen, Guest Professor<sup>2</sup>, Janne S. Tolstrup, Professor<sup>1</sup>  
20  
21  
22  
23  
24

25 **Affiliations:** <sup>1</sup> National Institute of Public Health, University of Southern Denmark, Copenhagen, Denmark,  
26  
27 <sup>2</sup> Danish Cancer Society Research Center, Copenhagen, Denmark, <sup>3</sup> Research Unit for General Practice in  
28  
29 Aalborg, Department of Clinical Medicine, Aalborg University Hospital, Aalborg, Denmark, <sup>4</sup> Research Unit  
30  
31 of General Practice, University of Southern Denmark, Odense, Denmark,  
32  
33  
34  
35  
36  
37

38 **Address correspondence to:** Nina Kamstrup-Larsen, National Institute of Public Health, University of  
39  
40 Southern Denmark, Copenhagen, Studiestræde 6, 1455 Copenhagen, Denmark. [nkal@niph.dk], +45-  
41  
42 65507818  
43  
44  
45

46 Number of words: 4,729 (exclusive of abstract, references, declarations, figures and tables)  
47  
48  
49  
50  
51  
52  
53  
54  
55  
56  
57  
58  
59  
60

## Abstract

**Background** The effectiveness of health checks aimed at the general population is disputable. However, it is not clear whether health checks aimed at certain groups at high risk may reduce adverse health behaviour and identify persons with metabolic risk factors and non-communicable diseases (NCDs).

**Objectives** To assess the effect of general practice-based health checks on health behaviour and incidence on NCDs in individuals with low socioeconomic position.

**Methods** Individuals with no formal education beyond lower secondary school and aged 45-64 years were randomly assigned to the intervention group of a preventive health check or to control group of usual care in a 1:1 allocation. Randomisation was stratified by gender and 5-year age group. Due to the real-life setting, blinding of participants was only possible in the control group. Effects were analysed as intention-to-treat and per protocol. The trial was undertaken in 32 general practice units in Copenhagen, Denmark.

**Intervention** Invitation to a prescheduled preventive health check from the general practitioner followed by a health consultation and an offer of follow-up with health risk behaviour change or preventive medical treatment, if necessary.

**Primary outcome measures** Smoking status at 12-month follow-up. Secondary outcomes included status in other health behaviours such as alcohol consumption, physical activity and body mass index (measured by self-administered questionnaire), as well as incidence of metabolic risk factors and NCDs such as hypertension, hypercholesterolemia, chronic obstructive pulmonary disease, type-2 diabetes mellitus, hypothyroidism, hyperthyroidism and depression drawn from national health care registries.

**Results** 1,104 participants were included in the study. For the primary outcome, 710 participants were included in the per protocol analysis, excluding individuals who did not attend the health check, and 1,104 participants were included in the intention to treat analysis. At 12-month follow-up 37% were daily smokers in the intervention group and 37% in the control group (odds ratio 0.99, 95% confidence interval

1  
2  
3  
4 0.76 to 1.30). No difference in health behaviour nor in the incidence of metabolic risk factors and NCDs  
5  
6 between the intervention and control group were found. Side effects were comparable across the two  
7  
8 groups.  
9

10  
11 **Conclusion:** The lack of effectiveness may be due to low intensity of intervention, a high prevalence of  
12  
13 metabolic risk factors and NCDs among the participants at baseline as well as a high number of contacts  
14  
15 with the general practitioners in general or to the fact that general practices are not an effective setting for  
16  
17 prevention.  
18  
19

20  
21 **Trial registration** Clinical Trials NCT01979107.  
22  
23  
24  
25  
26  
27

#### 28 **Strengths and limitations of this study**

- 29 • A major strength of this study is that it is a large-scale community-based  
30 health check intervention implemented in 32 general practice clinics and  
31 evaluated with long follow-up (1 year) and in a randomised controlled design.
- 32 • The study targets both health behaviour changes and detection of non-  
33 communicable diseases and combines both patient-reported and register-  
34 based outcomes.
- 35 • The patient-reported data were linked at the individual level with national  
36 health register and obtained information on non-communicable diseases,  
37 which ensured no loss to follow-up regarding this outcome.
- 38 • The study focuses on individuals with low socioeconomic – an under-studied  
39 group in health check interventions.
- 40 • The limitations of this study include the lack of data on smoking status in non-  
41 respondents and no access to primary care medical records with details on  
42 any condition not leading to hospital contact.
- 43  
44  
45  
46  
47  
48  
49  
50  
51  
52  
53  
54  
55  
56  
57  
58  
59  
60

## Introduction

There is a large body of evidence that developing non-communicable diseases (NCDs) is closely linked with modifiable health behaviours such as smoking, alcohol consumption, poor diet and physical inactivity as well as metabolic risk factors such as hypertension, lipid levels and blood glucose, and obesity (1).

Furthermore, the occurrence of multiple of these adverse health behaviours are strongly associated with mortality (2) but are difficult to modify (3). Health checks may identify individuals with adverse health behaviour and detect metabolic risk factors and NCDs at an early stage (4). To prevent NCDs or limit future harms from NCDs, health checks may provide an opportunity to motivate for behavioural change or to initiate appropriate preventive medical treatment. Benefits of general preventive health checks are, however, disputed. One Cochrane review, which included 14 trials on general health checks (N=533-57,460), concluded that health checks offered to the general population did not reduce morbidity or mortality beyond that of usual care (5). Most of the included trials, however, took place 20-30 years ago, prior to the introduction of much of the preventive medication in current use (6). A more recent meta-analysis, including six trials conducted in general practice (N=1442-7229) showed improvements in blood pressure, total cholesterol and body mass index (BMI), and reduced the proportion of patients remaining at high risk for NCDs (7). Amongst others, low socioeconomic position (SEP) has been shown to be associated with non-participation in health checks (5, 8-11). Because of the lower participation among individuals of low SEP (10) and a social gradient in modifiable adverse health behaviours and NCDs (1, 12, 13) it has been suggested that further research in the field of health check should put an extra effort into recruiting especially socioeconomically disadvantaged individuals (5, 10).

In Denmark, general practice and municipalities have a shared responsibility for preventive services aimed at the individual. General practitioners (GP) assess patient health and implement disease-specific secondary prevention, the municipalities are tasked with primary prevention such as smoking cessation, alcohol treatment, and other lifestyle related services (14). GPs collaborate closely with municipal services and can



1  
2  
3  
4 refer to some services, for instance, lifestyle change programs at the municipality health centre (15).

5  
6 Visiting the GP is free of charge, and around 98% of the population is assigned to one specific GP (16).

7  
8  
9 The 'Check-In' intervention was developed to test the effectiveness of a preventive health check in a  
10  
11 randomised controlled trial (RCT) at general practice offered to individuals with low SEP as measured by  
12  
13 short education. It was developed in response to health-behaviour models in which increased awareness  
14  
15 about the causes, consequences and cures for a particular health behaviour or health problem is expected  
16  
17 to increase the likelihood for change (17) and in which knowledge is expected to lead to action (18). A  
18  
19 preventive health check at the GP has the potential to confront the patient with a problem and provide  
20  
21 feedback about both adverse health behaviour and the consequences of continuing the injurious  
22  
23 behaviour. For example, poor lung function measure can demonstrate the health consequences of smoking  
24  
25 and lead to a discussion about the adverse effects of smoking which may increase the chance for smoking  
26  
27 cessation.  
28  
29  
30

31  
32 Short education was used as measure for low SEP as educational level captures the influence of resources  
33  
34 on health and the knowledge and skills attained through education may affect an individual's cognitive  
35  
36 functioning, make individuals more receptive to health education messages, or more able to communicate  
37  
38 with and access appropriate health services (19).  
39  
40

41  
42 We set out to test if 'Check-In' results in lower prevalence of adverse health behaviour such as smoking,  
43  
44 excessive alcohol consumption, physical inactivity and obesity, and to test if 'Check-In' results in more new  
45  
46 hospital contacts and prescription medication for metabolic risk factors and NCDs such as hypertension,  
47  
48 hypercholesterolemia, chronic obstructive pulmonary disease (COPD), type-2-diabetes mellitus (T2DM),  
49  
50 hypothyroidism, hyperthyroidism and depression. In this article we report on the effects of 'Check-In' at 12-  
51  
52 month follow-up.  
53  
54  
55  
56  
57  
58  
59  
60

## Method and material

### *Trial design*

'Check-In' was a two-arm 1:1 randomised controlled trial conducted in Copenhagen, Denmark from January 2014 to September 2016. The trial was notified to the Danish Data Protection Agency (J.nr. 16/100534) and a notification regarding the project was made to The National Committee on Health Research Ethics. However, according to the Act on Research Ethics Review of Health Research Projects (section 14,2) projects like 'Check-In' does not need ethical approval from a Research Ethics Board (Protocol no.: H-1-2013-FSP). The trial is registered at ClinicalTrials.gov (ID NCT01979107; October 25, 2013).

### *Identification of the study population*

All 126 general practices in four different suburbs of Copenhagen, Denmark, were invited by letter and phone to participate in the study. The recruitment of the GPs was, however, challenged due to a break down in the collective bargaining between the Danish Regions Salary and Rate Board (RTLN) and the Organisation of General Practitioners (PLO) in late 2012 (20). In all, 'Check-In' ended up having five rounds between January 2014 to September 2016.

GPs do not systematically register their patients' educational level. Therefore, to identify the study population baseline questionnaires in Danish (including items about sex, date of birth, cohabitation status, highest educational level achieved, height and weight, smoking status, alcohol consumption, physical activity, diet, general self-efficacy, perceived stress and family disposition of NCDs) were sent out to all individuals aged 45-64 years, who lived in Copenhagen and who were on the participating GPs' patient lists. The questionnaire was accompanied by a short letter from the GP and the research team describing that the questionnaire information would be entered into the electronic patient record at the GP, and thus could be used in future visits. Furthermore, it was explained that the questionnaire was part of a larger research project and that participation was voluntary and without negative consequences for the

1  
2  
3  
4 continuing doctor-patient relationship. At the end of the questionnaire, individuals were asked to indicate if  
5 they would consent to be contacted for participation in a future research project.  
6  
7

8  
9 Eligible patients met the inclusion criteria which were no formal education beyond lower secondary school  
10 and consent to be contacted for research purpose. No exclusion criteria were implied.  
11  
12  
13  
14  
15  
16  
17

### 18 *Randomisation*

19  
20  
21 Eligible patients were randomised in SAS by a data manager at the National Institute of Public Health to  
22 either 'Check-In' or usual care in a 1:1 allocation. The randomisation was stratified by gender and 5-year  
23 age group. Couples living together were allocated to the same group to avoid contamination.  
24  
25  
26  
27

28 Double-blinded, meaning that both patients and GPs were blinded to the allocation of group, would have  
29 been ideal (21) nevertheless, due to real-life setting, blinding of participants was only possible in the  
30 control group and not in the intervention group and among GPs.  
31  
32  
33  
34  
35  
36  
37  
38

### 39 *Interventions*

#### 40 41 42 'Check-In' group (intervention)

43  
44  
45 The intervention included I) an invitation to a prescheduled health check, II) a health check at the GP, III) a  
46 health consultation at the GP which included an offer of further action if necessary.  
47  
48  
49

#### 50 51 I) *Invitation*

52  
53 All participants allocated to the intervention group received a postal invitation to a prescheduled health  
54 check from their GP and the research team. Included with the invitation was a written description of the  
55 project. Furthermore, it was clarified that study participation was voluntary and that withdrawal could  
56  
57  
58  
59  
60

1  
2  
3  
4 occur at any time. Three days before the prescheduled appointment, participants in the intervention group  
5  
6 were reminded by phone by a member of the research team.  
7  
8

9  
10 *II) Health check*  
11

12 Before the health check the GPs received results from the patient-reported questionnaire in the GPs  
13  
14 electronic patient record in the form of an electronic data interchange (EDI) message including summed  
15  
16 scores and categorisation of items from the baseline questionnaire (Supplementary file 1). The health  
17  
18 check was free of charge and took place during the opening hour of the general practice clinic to which the  
19  
20 patient was registered and was conducted by either the GP or other health staff at the clinic as per usual  
21  
22 clinical practice. The health check consisted of measurements of weight and height, hip and waist  
23  
24 circumference, cholesterol, glycated haemoglobin, thyroidal status and spirometry for smokers or former  
25  
26 smokers. The health consultation with the purpose of review of results was scheduled at the health checks.  
27  
28  
29

30  
31 *III) Health consultation*  
32

33  
34 At the health consultation the GP reviewed the results from the health check in combination with the  
35  
36 summarised results of the questionnaire. Participants with abnormal screens, or health behaviour  
37  
38 amenable to intervention at the health check, either follow the medical standards for general practice on  
39  
40 procedures for diagnostics and treatment or received the offer of a referral to the municipality health  
41  
42 centre for a lifestyle change program. Furthermore, these participants were offered an additional health  
43  
44 check scheduled six months after the first health check. Decisions for further action and reasons for referral  
45  
46 or not were indicated by the GP in a project specified form.  
47  
48  
49

50  
51 Usual care (control)  
52

53  
54 Participants allocated to the control group received unrestricted usual care during the intervention period.  
55  
56 The results from the questionnaires were entered in the GPs electronic patient record, however, no  
57  
58 feedback was provided to the patients.  
59  
60

### *Measurement of health behaviour*

Health behaviour was measured from a self-administrated questionnaire at baseline and at 12-month follow-up. The questionnaire contained information about sociodemographic characteristics (education level, cohabitation status), health related quality of life (12-Item Short Form Health Survey) (22, 23), height and weight, smoking status, alcohol consumption, physical activity, diet, pulmonary symptoms, family dispositions of chronic diseases, general self-efficacy (24, 25) and stress (measured by Cohen's 10-items Perceived Stress Scale (PSS)) (26).

The primary outcome was self-reported smoking status at 12-month follow-up. Questions included "Do you smoke?", with the response categories "yes, daily", "yes, I smoke occasional", "no, I stopped less than six months ago", "no, I stopped more than six months ago", "no, I have never smoked"; dichotomised into 'daily smokers' vs 'not daily smokers', and "How much do you approximately smoke each day?" used as continuous outcome.

Secondary outcomes included self-reported alcohol consumption, physical activity, BMI, self-efficacy and perceived stress. Alcohol consumption was measured as binge drinking (five or more units of alcohol on the same occasion) dichotomised into 'weekly or more frequent' vs 'less than weekly', and units of alcohol each day during the week used as a continuous outcome. Physical activity was measured from two questions on hours spend on exercise "making you short of breath" during the week and everyday exercise, dichotomised into physical inactivity (yes, no), 'yes' defined as less than 150 minutes of moderate-intensity physical activity throughout the week, less than 75 minutes of vigorous-intensity physical activity throughout the week or an equivalent combination of moderate- and vigorous-intensity activity and 'no' defined as more, as defined by WHO (27). BMI was generated from questions about height and weight and analysed as a dichotomised outcome into obese yes/no, 'yes' defined as  $BMI \geq 30$  and 'no' defined as  $BMI < 30$  (28) and as a continuous outcome (Supplementary file 2). Stress during the past month was

1  
2  
3  
4 assessed by the PSS (score range 0-40) (26). The person's belief in their innate ability to achieve goals was  
5  
6 assessed using general self-efficacy (score range 10-40) (25, 29).  
7  
8  
9  
10  
11

### 12 *Measurement of metabolic risk factors and NCDs*

13  
14  
15 Metabolic risk factors and NCDs were measured as any hospital contact and/or prescription medication for  
16  
17 hypertension, hypercholesterolemia, COPD, T2DM, thyroid disease and depression in the follow-up period.  
18  
19 International Classification of Diseases (ICD-10) codes and Anatomical Therapeutic Chemical Classification  
20  
21 (ATC) codes were specified for each of the conditions. The algorithm in the supplementary files give an  
22  
23 overview of the used definitions (Supplementary file 3).  
24  
25  
26

27  
28 All citizens with a permanent residence in Denmark have a unique personal identification number (CPR-  
29  
30 number), which makes it possible to link individual information from surveys to nation-wide administrative  
31  
32 registries (30). For information about hospital contacts and discharge diagnoses we linked to the Danish  
33  
34 National Patient Register (31). The Danish National Prescription Registry (32) was used to obtain  
35  
36 information on dispensed prescription medications.  
37  
38  
39

40 To ensure that only new contacts and/or prescription medication of metabolic risk factors and NCDs were  
41  
42 included in the incidence analysis, register-based data on metabolic risk factors and NCDs were collected  
43  
44 for a period of 15 years for diagnosis and 2 years for prescription medication before the baseline  
45  
46 questionnaire were sent.  
47  
48

49 Furthermore, information on date of death was extracted from the Danish Register of Causes of Death (33).  
50  
51 The Danish National Health Services Register was used for information on contacts with the general  
52  
53 practice (16).  
54  
55  
56  
57  
58  
59  
60

### *Sample size consideration*

The number of individuals to include in the 'Check-In' and usual care group were determined prior to data collection. Sample size calculation was performed to test the difference between two proportions (34). We expected a participation rate of 75% for the health check. Based on prevalence from the Danish National Health Survey from 2010, a daily smoking prevalence of 41% was assumed in the 45-64-year-old individuals with basic education; of these we expected that 50% were motivated to quit smoking (35). High-standard smoking cessation courses have been shown to yield a cessation prevalence of 20-30% (36). In the usual care group, we expected a cessation prevalence of 5%. Thus, we needed 150 daily smokers in each arm to detect a difference in quit rates of 15% with 80% power.

### *Statistical analysis*

To compare health behaviour at 12-month follow-up in the 'Check-In' and usual care group logistic regression modelling estimated intervention effectiveness on the binary outcomes daily smoking, binge drinking, obesity and physical inactivity. The model included the condition variable ('Check-In' versus usual care). For the continuous outcomes, cigarettes per day (among daily smokers), drinks per week (among those who drink alcohol) and BMI, median and interquartile range (IQR) were estimated.

The analyses were performed i) per protocol, excluding individuals who did not attend the health check and ii) intention-to-treat (ITT). ITT analyses are recommended in the CONSORT statement (37) and implies that all randomised individuals are included in the analysis regardless of whether they attended the prescheduled health check or not. For the ITT analyses, we estimated missing data using multiple imputation (38). The imputation process for each outcome utilized participant's sex, age, ethnicity, cohabitant and employment status, condition variable and baseline specific variable. Twenty imputations were undertaken for each imputation, estimate and pooled results from these were used. In general, missing at specific item responses were low at baseline (less than 5%) – except for *drinks per week* (7%

1  
2  
3  
4 missing) and *self-efficacy* (6% missing) (data not shown). Final levels of missing data on primary outcome  
5  
6 were 1% at baseline and 25% at 12-month follow-up. Missing at follow-up was primary due to non-  
7  
8 response.  
9

10  
11 To compare metabolic risk factors and NCDs at 12-month follow-up in the 'Check-In' and usual care group  
12  
13 logistics regression were conducted for each of the outcomes hypertension, hypercholesterolemia, COPD,  
14  
15 diabetes, hypothyroidism and hyperthyroidism. Furthermore, the analyses were conducted for *Any new*  
16  
17 *chronic condition*, defined as 'yes' if any new metabolic or NCDs were found in the follow-up period.  
18  
19

20  
21 The analyses were performed both regarding *all* contacts/prescription medication (prevalence) and *first*  
22  
23 contacts/prescriptions for metabolic risk factors and NCDs (incidence). The prevalence analysis included all  
24  
25 individuals who had contact with the hospital and/or prescription medication for the metabolic risk factors  
26  
27 and NCDs in the 12-month follow-up period. The incidence analyses excluded individuals who already had  
28  
29 the specific metabolic risk factor or NCD at baseline. Information on metabolic risk factors and NCDs were  
30  
31 obtained from registers and no missing occurred in these variables.  
32  
33

34  
35 To evaluate the stability of our results an Interclass Coefficient (ICC) was estimated within a two-level  
36  
37 model with patients (level 1) nested within general practices (level 2), and all estimates were calculated in  
38  
39 the model including the condition variable and general practices as random intercept, allowing for  
40  
41 correlation between patients from the same general practice (39). Furthermore, sensitivity analysis  
42  
43 including age and sex in the logistic regression were carried out.  
44  
45  
46  
47  
48

#### 49 *Patient and public involvement*

50  
51  
52 Patients were not formally involved in the development of the trial. The 'Check-In' intervention was,  
53  
54 however, developed in close integration with general practitioners. Before 'Check-In' was rolled out in the  
55  
56 bigger scale the feasibility of the intervention was tested in a pilot study. In the pilot study the  
57  
58 questionnaire was tested among the target group by interviewing them after they filled it in and non-  
59  
60



1  
2  
3  
4 responders were contacted by phone to include their experiences and reasons to not answer. Participants  
5  
6 will not be directly contacted with results. All findings, including null findings will be communicated to the  
7  
8 public by use of press releases and a report in lay-language.  
9

## 10 11 12 13 14 **Results**

### 15 16 17 *Participant flow*

18  
19  
20 Of the 126 general practices invited, 32 clinics, including 56 GPs, agreed to participate (clinic level  
21  
22 participation 25%). Figure 1 shows the flow diagram of 'Check-In'. In total, 17,063 patients were mailed a  
23  
24 baseline questionnaire. Of the 8,508 (49%) who responded to the baseline questionnaire, 1,104 met the  
25  
26 inclusion criteria regarding level of education and marked that they could be contacted again (range per  
27  
28 general practice clinic: 12-110 individuals; median=18). Of the 1,104 participants, 549 were randomised to  
29  
30 the 'Check-In' group and invited to the prescheduled health check, which 364 attended (attendance rate of  
31  
32 66%). Of the 1,104 participants, 850 completed the follow-up questionnaire at 12 months (response rate of  
33  
34 77%). The number analysed for the 'per protocol' depended on the specific outcome – for the primary  
35  
36 outcome daily smoking this was 710, 303 for the 'Check-In' group and 407 for the usual care group. For the  
37  
38 ITT analyses, the number of analysed equal the number allocated to 'Check-In' and usual care group,  
39  
40 respectively (Figure 1).  
41  
42  
43  
44  
45  
46  
47

### 48 *Baseline characteristics*

49  
50 Table 1 shows the baseline characteristics for the 'Check-In' and usual care group. The average age was 54  
51  
52 years, about half were men and more than 40% were unemployed or on social security. About 41%  
53  
54 reported daily smoking and 17% in the 'Check-In' group and 20% in the usual care group reported 'binge  
55  
56 drinking at least weekly'. Median BMI was 26, with 20% obese in 'Check-In' group and 23% in usual care  
57  
58  
59  
60

1  
2  
3  
4 group at baseline. Overall, 61% in the 'Check-In' and 64% in the usual care group, respectively, had at least  
5  
6 one NCD and 18% had  $\geq 3$  NCDs in the two groups. Around 88% had had contact with their GP within the  
7  
8 last year. The baseline characteristics were well balanced between the 'Check-In' and usual care group  
9  
10 (Table 1).  
11  
12  
13  
14  
15  
16

### 17 *Effectiveness of 'Check-In' on daily smoking and other health behaviour*

18  
19  
20 After 12 months of follow-up no difference was found between the 'Check-In' and usual care group on daily  
21  
22 smoking (ITT: odds ratio (OR)=0.99; 95% confidence interval (95% CI):0.58-1.09), binge drinking (ITT:  
23  
24 OR=0.82; 95% CI:0.59-1.14), physical inactivity (ITT: OR=0.97; 95% CI:0.74-1.27) or obesity (ITT: OR=0.90;  
25  
26 95% CI:0.67-1.21) (Table 2) – this was seen in both the per protocol and ITT analysis. No differences were  
27  
28 found for comparison of number of cigarettes/day (ITT: Coefficient (coef.)=0; 95% CI: -2.9-2.9)), units of  
29  
30 alcohol/day (ITT: coef.=0; 95% CI: -1.7-1.8) and BMI (ITT: coef.= -0.5; 95% CI: -1.2-0.1)(Table 3) indicating no  
31  
32 effect of 'Check-In' on daily smoking or other health behaviour. Further, no difference between the two  
33  
34 groups were found regarding self-efficacy where both groups had a median at 29 (IQR for 'Check-In' 25,33;  
35  
36 IQR for usual care 24,34) (data not shown).  
37  
38  
39  
40  
41  
42  
43

### 44 *Effectiveness of 'Check-In' on detection of metabolic risk factors and NCDs*

45  
46  
47 At 12-month follow-up, we found a difference in incidence of depression in the 'Check-In' group when  
48  
49 compared to usual care (OR=2.90; 95% CI: 1.34-6.29) and a tendency for COPD (OR=1.44; 95% CI: 0.83-2.50)  
50  
51 (Table 4). No differences between the 'Check-In' and usual care groups was observed for incidence in  
52  
53 hypertension, hypercholesterolemia and diabetes. The estimates for hypothyroidism and hyperthyroidism  
54  
55 have not been reported for ethical reasons as there were too few cases to report. (Table 4).  
56  
57  
58  
59  
60

1  
2  
3  
4 We found no differences between the Check-In and the usual care group in prevalence of hypertension,  
5  
6 hypercholesterolemia, COPD, T2DM, hypothyroidism, hyperthyroidism or depression (Supplementary file 4)  
7  
8 – this was seen in both the per protocol and ITT analysis.  
9

#### 10 11 12 13 14 15 *Stability of our results and sensitivity analysis*

16  
17  
18 The ICC was low (ICC=0.008) indicating that patients within the same general practice were not clustered,  
19  
20 and all estimates from multi-level analyses (data not shown) showed no different in estimates compared  
21  
22 with estimates from logistics regression. The adjusted sensitivity analysis did not affect the estimates (data  
23  
24 not shown). In addition, the baseline characteristics for those lost to follow-up and those not lost to follow-  
25  
26 up were comparable, however, the proportion of daily smokers and physical inactive were higher among  
27  
28 those lost to follow-up compared to those not lost to follow-up (Supplementary file 5).  
29  
30  
31  
32  
33  
34

#### 35 *Potential side effects*

36  
37  
38 To evaluate potential side effects of 'Check-In' we analysed perceived level of stress for the 'Check-In' and  
39  
40 usual care group at 12-month follow-up. We found no difference between the two groups; both groups had  
41  
42 a median at 16 on the perceived level of stress scale (IQR for 'Check-In' 11,20; IQR for usual care 11,21)  
43  
44 (data not shown).  
45  
46  
47  
48  
49  
50

#### 51 **Discussion**

52  
53  
54 In this randomised controlled trial, we found no effect of an intervention of GPs invited individuals with low  
55  
56 SEP to a prescheduled preventive health check. We found no differences in smoking status, alcohol  
57  
58 consumption, physical inactivity, BMI or in the prevalence of metabolic risk factors and NCDs at 12-month  
59  
60

1  
2  
3  
4 follow-up between the 'Check-In' group and usual care group. We did, however, find a difference in  
5  
6 incidence of depression, as measured by first prescription of antidepressant medication between the  
7  
8 'Check-In' and the usual care group at 12-month follow-up.  
9

10  
11 The baseline characteristics showed that more than 40% of the participants were daily smokers (Table 1) as  
12  
13 compared to 17% in the general Danish population (40). This indicated that we did reach a group with a  
14  
15 more adverse health behaviour profile than the general population. However, the intensity of the  
16  
17 intervention might have been too low to achieve sufficient change of adverse health behaviour among  
18  
19 individuals with low socioeconomic position, which may have contributed to the lack of measurable  
20  
21 behavioural change in 'Check-In'. In a previous Danish study of health checks a significant higher smoking  
22  
23 abstinence rate were found in a high intensity intervention group compared to usual care (41). The high  
24  
25 intensity intervention included a consultation based on motivational interviewing, complementary samples  
26  
27 of nicotine products, a self-help pamphlet, and the offer of participation in six smoking cessation group  
28  
29 counselling sessions over a period of 5 months (41). Moreover, higher socioeconomic position was a  
30  
31 predictor of successful smoking cessation (41). In contrast, 'Check-In' relied on the behaviour change  
32  
33 services offered by the municipality since 2007 (15, 42). The idea in 'Check-In' was that patients with  
34  
35 adverse health behaviour amenable to intervention at the health check should be offered a referral to the  
36  
37 municipality health centre for a free lifestyle change program. However, project data indicated that the  
38  
39 opportunity of a referral may have been under-utilized as some of the patients rejected a referral to the  
40  
41 municipality, and in some cases, the GP considered a referral to be irrelevant. The result was a low level of  
42  
43 intensity of the part of the intervention targeting adverse health behaviour.  
44  
45  
46  
47  
48

49  
50 Our results are, however, in line with the results from another study focusing at patients with high risk of  
51  
52 cardiovascular disease, as they found no differences in the proportion of non-smoking among patients in  
53  
54 the intervention compared with usual-care group (43).  
55  
56  
57  
58  
59  
60

1  
2  
3  
4 The lack of effectiveness of 'Check-In' regarding more new hospital contacts and prescription medication  
5  
6 for metabolic risk factors and NCDs can be ascribed to the fact that more than 60% of individuals included  
7  
8 in the study were known with one or more NCDs at baseline. Most had visited their GP within the last year  
9  
10 with a median number of contacts to the GP of 7 and 8 in the 'Check-In' and usual care group respectively  
11  
12 (Table 1). Patients with a known NCD may, as such most likely, already be in some kind of scheduled  
13  
14 treatment at their GP. This illustrates that in terms of health, it is indeed a high-risk group participating in  
15  
16 'Check-In', but the intervention may not in absolute numbers have picked up many individuals undiagnosed  
17  
18 with metabolic risk factors or NCDs, although we did see that there were more persons who initiated  
19  
20 treatment with antidepressants in the 'Check-In' group compared to the usual care group. This is in line  
21  
22 with another Danish study (44). Even so, we cannot completely rule out that the effectiveness regarding  
23  
24 depression was due to chance because of the small sample size in 'Check-In'.  
25  
26  
27  
28  
29

### 30 *Strengths and weaknesses*

31  
32 One strength of the study was that the randomisation resulted in two balanced groups at baseline and  
33  
34 minimised the influence of known and unknown confounding in the comparison of the 'Check-In' and the  
35  
36 usual care group. Another strength was the use of both patient-reported-outcomes and register-based  
37  
38 outcomes, where the use of register-based data allowed us to follow all individuals in the study  
39  
40 independent of attendance and respond to follow-up questionnaire. A third strength in 'Check-In' was the  
41  
42 real-life setting, where the health checks were carried out at the general practice clinics to which the  
43  
44 patients were registered. Previous trials testing the effectiveness of preventive health check have been  
45  
46 criticized for designing a special unit to deliver the health check (6). In 'Check-In' it was an assumption that  
47  
48 GPs, may be in a better position to deliver preventive health services than other health professionals and  
49  
50 can offer professional advice accounting for the patients' state of health in order to encourage compliance  
51  
52 (45).  
53  
54  
55  
56  
57  
58  
59  
60

1  
2  
3  
4 A potential limitation in the study was contamination between groups, which potentially occurred if  
5 patients in the usual care group had treatment beyond usual care, e.g. a health check in the intervention  
6 period or if GPs because of the project had more awareness of the preventive work such as smoking  
7 cessation when seeing patients allocated to usual care regarding other health issues. However, the risk of  
8 contamination is low because GPs did not know who were allocated to the usual care group and couples  
9 living together were allocated to same group. If contamination had occurred the observed effectiveness of  
10 the intervention is most likely conservative. Another limitation is the lack of data on smoking status in non-  
11 respondents and that we had no access to GP chart notes – any condition not leading to hospital contact  
12 are not registered. However, our inclusion of prescription medication should ensure the capture of  
13 conditions only managed in general practice.  
14  
15

16  
17 Furthermore, our sample calculations were based on several assumptions which can be discussed. The  
18 assumption that half are motivated to quit smoking can seem high and cannot be verified in the design.  
19 This assumption is, however, supported by the literature where 63% of daily smokers in Denmark with no  
20 education beyond lower secondary school are found to be motivated to quit smoking (40). Moreover, the  
21 10% a-priori loss to follow-up was conservative when compared to the fact that the actually loss was 24%.  
22 Nevertheless, in total, 228 and 225 daily smokers were enrolled in the 'Check-In' intervention and control  
23 group, respectively, which exceeded the sample size calculations that indicated that we needed 150 daily  
24 smokers in each group. This indicates that despite a higher loss to follow-up than expected the sample was  
25 most likely large enough to detect had there been any effect of 'Check-In' regarding adverse health  
26 behaviour. It can be argued that the GPs who participated in 'Check-In' were especially motivated, hence, if  
27 no effect on health behaviour and detection of metabolic risk factors and NCDs are found with these GPs it  
28 is plausible to say that no effect will be found if the intervention were rolled out to all GPs. However,  
29 further studies are needed to understand non-participants and to understand the process after a  
30 preventive health at the GP.  
31  
32  
33  
34  
35  
36  
37  
38  
39  
40  
41  
42  
43  
44  
45  
46  
47  
48  
49  
50  
51  
52  
53  
54  
55  
56  
57  
58  
59  
60

1  
2  
3  
4  
5  
6  
7  
8  
9  
10  
11  
12  
13  
14  
15  
16  
17  
18  
19  
20  
21  
22  
23  
24  
25  
26  
27  
28  
29  
30  
31  
32  
33  
34  
35  
36  
37  
38  
39  
40  
41  
42  
43  
44  
45  
46  
47  
48  
49  
50  
51  
52  
53  
54  
55  
56  
57  
58  
59  
60

## Conclusion

This study suggests that a systematic offer of a preventive health check at the general practice aimed at individuals with low SEP have no effect on adverse health behaviour or incidence on metabolic risk factors or NCDs compared to usual care. The explanations can be low intensity of intervention, a high prevalence of metabolic risk factors and NCDs among the participants at baseline, a high number of contacts with the GP in general or that general practices are not an effective setting for primary prevention.

## List of abbreviations

95% CI = 95% confidence interval

BMI = body mass index

Coef. = coefficient

COPD = chronic obstructive pulmonary disease

EDI = electronic data interchange

GP = general practitioner

ITT = intention-to-treat

IQR = interquartile range

NCD = non-communicable disease

OR = odds ratio

RCT = randomised controlled trial

1  
2  
3  
4 SEP = socioeconomic position  
5  
6

7 T2DM = type-2 diabetes mellitus  
8  
9  
10  
11  
12

### 13 **Declarations**

14

15  
16 Ethics approval and consent to participate  
17

18  
19 ‘Check-In’ was developed to examine primary prevention aspects beyond existing standard clinical practice,  
20 thus no persons were refused access to standard clinical care. Participation was voluntary, and our  
21 information material highlighted the option to withdraw without further explanation and without  
22 consequences for any treatment or other contact with the GP. Personal identification is encrypted, and  
23 data is kept in accordance with the requirements of the Danish Data Protection Agency.  
24  
25  
26  
27  
28  
29

30  
31 The trial was notified to the Danish Data Protection Agency (permission 2015-57-0008, Acadre no.  
32 16/100534) and the National Committee on Health Research Ethics was notified of the project. However,  
33 according to the Act on Research Ethics Review of Health Research Projects (section 14.2), projects like  
34 ‘Check-In’ do not need ethical approval from a Research Ethics Board (Protocol no.: H-1-2013-FSP). The trial  
35 is registered at ClinicalTrials.gov (Early detection of and intervention towards chronic diseases; ID  
36 NCT01979107; October 25, 2013).  
37  
38  
39  
40  
41  
42  
43  
44  
45  
46  
47  
48

49 Consent for publication  
50

51  
52 Not applicable.  
53  
54  
55  
56  
57

58 Data sharing statement  
59  
60



1  
2  
3  
4 The data that support the findings of this study is located at Statistics Denmark and is only available under  
5  
6 licence and are therefore not publicly available.  
7  
8  
9

#### 10 11 12 Competing interests

13  
14  
15 All authors declare that they have no competing interests.  
16

17  
18 All authors have completed the Unified Competing Interest form (available on request from the  
19  
20 corresponding author) and declare: no support from any organisation for the submitted work [or describe if  
21  
22 any]; no financial relationships with any organizations that might have an interest in the submitted work in  
23  
24 the previous three years, no other relationships or activities that could appear to have influenced the  
25  
26 submitted work.  
27  
28  
29  
30  
31  
32

#### 33 34 Funding

35  
36  
37 The project was funded by the Danish Cancer Society. The Danish Cancer Society had no influence on  
38  
39 design, analysis and interpretation of the results.  
40  
41  
42  
43

#### 44 45 Authors' contributions

46  
47 NKL participated in the design of the study and its coordination and drafted the manuscript. JST  
48  
49 participated in the design of the study. NKL and JST performed the statistical analysis. MBJ participated in  
50  
51 the design of the study and its coordination. JLT participated in the design of the study. LBL participated in  
52  
53 the design of the study. MG participated in the design of the study. CJ participated in the design of the  
54  
55 study. SOD participated in the design of the study and its coordination and supervised the statistical  
56  
57 analysis. All authors read and approved the final manuscript.  
58  
59  
60

1  
2  
3  
4 NKL affirms that the manuscript is an honest, accurate, and transparent account of the study being  
5  
6 reported; that no important aspects of the study have been omitted; and that any discrepancies from the  
7  
8 study as planned (and, if relevant, registered) have been explained.  
9

10  
11 The corresponding author has the right to grant on behalf of all authors and does grant on behalf of all  
12  
13 authors, an exclusive license (or non exclusive for government employees) on a worldwide basis to the BMJ  
14  
15 Publishing Group Ltd to permit this article (if accepted) to be published in BMJ editions and any other  
16  
17 BMJPGJ products and sublicenses such use and exploit all subsidiary rights, as set out in our license.  
18  
19  
20  
21  
22  
23

#### 24 Acknowledgements

25  
26  
27 The authors would like to acknowledge all participants taking part in the 'Check-In' trial – both GPs and  
28  
29 patients.  
30  
31

32  
33 Thanks to Annette Kjær Ersbøll for supervision on the sample size calculations and Bjarne Laursen for  
34  
35 supervision on the data management and for generated the randomisation.  
36  
37  
38  
39  
40  
41  
42  
43  
44  
45  
46  
47  
48  
49  
50  
51  
52  
53  
54  
55  
56  
57  
58  
59  
60

## References

1. World Health Organization. Global status report on noncommunicable diseases 2014. World Health Organization; 2014.
2. Van Dam RM, Li T, Spiegelman D, Franco OH, Hu FJB. Combined impact of lifestyle factors on mortality: prospective cohort study in US women. 2008;337:a1440.
3. Alageel S, Gulliford MC, McDermott L, Wright AJBo. Multiple health behaviour change interventions for primary prevention of cardiovascular disease in primary care: systematic review and meta-analysis. 2017;7(6):e015375.
4. Wilson JM, Jungner YG. [Principles and practice of mass screening for disease]. Bol Oficina Sanit Panam. 1968;65(4):281-393.
5. Krogsboll LT, Jorgensen KJ, Gronhoj Larsen C, Gotzsche PC. General health checks in adults for reducing morbidity and mortality from disease. Cochrane Database Syst Rev. 2012;10:CD009009.
6. Sox HC. The health checkup: was it ever effective? Could it be effective? JAMA. 2013;309(23):2496-7.
7. Si S, Moss JR, Sullivan TR, Newton SS, Stocks NP. Effectiveness of general practice-based health checks: a systematic review and meta-analysis. Br J Gen Pract. 2014;64(618):e47-53.
8. Bjerregaard AL, Maindal HT, Bruun NH, Sandbaek A. Patterns of attendance to health checks in a municipality setting: the Danish 'Check Your Health Preventive Program'. Prev Med Rep. 2017;5:175-82.
9. Petter J, Reitsma-van Rooijen MM, Korevaar JC, Nielen MM. Willingness to participate in prevention programs for cardiometabolic diseases. BMC Public Health. 2015;15:44.
10. Bender AM, Jorgensen T, Helbech B, Linneberg A, Pisinger C. Socioeconomic position and participation in baseline and follow-up visits: the Inter99 study. Eur J Prev Cardiol. 2014;21(7):899-905.
11. Dryden R, Williams B, McCowan C, Themessl-Huber M. What do we know about who does and does not attend general health checks? Findings from a narrative scoping review. BMC Public Health. 2012;12:723.
12. Marmot M, Bell R. Fair society, healthy lives. Public Health. 2012;126 Suppl 1:S4-10.
13. Olsen GS, Holm AS, Jorgensen T, Borglykke A. Distribution of ideal cardiovascular health by educational levels from 1978 to 2006: a time trend study from the capital region of Denmark. Eur J Prev Cardiol. 2014;21(9):1145-52.
14. Pedersen KMS, J. . Det samarbejdende hospital: Almen praksis og kommuner. Fremtidens Hospital. København: Munksgaard; 2014. p. 115-26.
15. Pedersen KM, Andersen JS, Sondergaard J. General practice and primary health care in Denmark. J Am Board Fam Med. 2012;25 Suppl 1:S34-8.
16. Andersen JS, Olivarius Nde F, Krasnik A. The Danish National Health Service Register. Scand J Public Health. 2011;39(7 Suppl):34-7.
17. Prochaska JO, DiClemente CC. Stages and processes of self-change of smoking: toward an integrative model of change. J Consult Clin Psychol. 1983;51(3):390-5.
18. Champion VL SC. The Health Belief Model. In: Glanz K, Rimer, BK., Viswanath, K., editor. Health Behavior and Health Education 2008. p. 45-66.
19. Galobardes B, Shaw M, Lawlor DA, Lynch JW, Davey Smith G. Indicators of socioeconomic position (part 1). J Epidemiol Community Health. 2006;60(1):7-12.
20. Nexøe J. Developing Danish general practice. Taylor & Francis; 2013.
21. Rothman KJ, Greenland S, Lash TL. Types of Epidemiologic Studies. In: Rothman KJ, Greenland S, Lash TL, editors. Modern Epidemiology. Third edition. Philadelphia, USA: Lippincott Williams & Wilkins; 2008. p. 87-110.
22. Ware JE, Jr., Sherbourne CD. The MOS 36-item short-form health survey (SF-36). I. Conceptual framework and item selection. Med Care. 1992;30(6):473-83.

23. Jenkinson C, Layte R, Jenkinson D, Lawrence K, Petersen S, Paice C, et al. A shorter form health survey: can the SF-12 replicate results from the SF-36 in longitudinal studies? *J Public Health Med.* 1997;19(2):179-86.
24. Bandura A. *Self-efficacy: The Exercise of Control.* New York: W.H.Freeman; 1997 1997.
25. Mikkelsen EG, Schwarzer R, Jerusalem M. Danish Version of the General Self-Efficacy Scale. <http://userpage.fu-berlin.de/health/danish.htm1999>.
26. Cohen S, Kamarck T, Mermelstein R. A global measure of perceived stress. *JHealth SocBehav.* 1983;24(4):385-96.
27. World Health Organization. Recommended levels of physical activity for adults aged 18 - 64 years. *Physical Activity and Adults.* [www.who.int](http://www.who.int): World Health Organization; 23th October 2017.
28. World Health Organization. Obesity and overweight [www.who.int](http://www.who.int): World Health Organization; 2017 [updated October 2017].
29. Bandura A. Self-efficacy: toward a unifying theory of behavioral change. *PsycholRev.* 1977;84(2):191-215.
30. Pedersen CB. The Danish Civil Registration System. *Scand J Public Health.* 2011;39(7 Suppl):22-5.
31. Lynge E, Sandegaard JL, Rebolj M. The Danish National Patient Register. *Scand J Public Health.* 2011;39(7 Suppl):30-3.
32. Kildemoes HW, Sorensen HT, Hallas J. The Danish National Prescription Registry. *Scand J Public Health.* 2011;39(7 Suppl):38-41.
33. Helweg-Larsen K. The Danish Register of Causes of Death. *Scand J Public Health.* 2011;39(7 Suppl):26-9.
34. Houe H. EAK, Toft N. Sample size and sampling methods. In: Houe H. EAK, Toft N., editor. *Introduction to veterinary epidemiology2004.*
35. Statens Institut for Folkesundhed., Sundhedsstyrelsen. *Sundhedsprofil2010.dk.* 2013.
36. Pisinger CH. *Behandling af tobaksafhængighed - Anbefalinger til en styrket klinisk praksis.* 2011 2011.
37. Moher D, Hopewell S, Schulz KF, Montori V, Gotzsche PC, Devereaux PJ, et al. CONSORT 2010 explanation and elaboration: updated guidelines for reporting parallel group randomised trials. *BMJ.* 2010;340:c869.
38. Spratt M, Carpenter J, Sterne JA, Carlin JB, Heron J, Henderson J, et al. Strategies for multiple imputation in longitudinal studies. *Am J Epidemiol.* 2010;172(4):478-87.
39. Merlo J, Chaix B, Ohlsson H, Beckman A, Johnell K, Hjerpe P, et al. A brief conceptual tutorial of multilevel analysis in social epidemiology: using measures of clustering in multilevel logistic regression to investigate contextual phenomena. *J Epidemiol Community Health.* 2006;60(4):290-7.
40. Jensen HAR, Davidsen,M., Ekholm,O., Christensen,A.I. *Danskernes sundhed - Den nationale sundhedsprofil 2017 [the Danes' health - The national health profile].* Sundhedsstyrelsen; 2018.
41. Pisinger C, Vestbo J, Borch-Johnsen K, Jorgensen T. Smoking cessation intervention in a large randomised population-based study. The Inter99 study. *Prev Med.* 2005;40(3):285-92.
42. Andersen PT, Jensen JJ. Healthcare reform in Denmark. *Scand J Public Health.* 2010;38(3):246-52.
43. Wood DA, Kotseva K, Connolly S, Jennings C, Mead A, Jones J, et al. Nurse-coordinated multidisciplinary, family-based cardiovascular disease prevention programme (EUROACTION) for patients with coronary heart disease and asymptomatic individuals at high risk of cardiovascular disease: a paired, cluster-randomised controlled trial. *Lancet.* 2008;371(9629):1999-2012.
44. Geyti C, Maindal HT, Dalsgaard EM, Christensen KS, Sandbaek A. Mental health assessment in health checks of participants aged 30-49 years: A large-scale cohort study. *Prev Med Rep.* 2018;9:72-9.
45. Devroey D, Coigniez P, Vandevoorde J, Kartounian J, Betz W. Prevention and follow-up of cardiovascular disease among patients without a personal GP. *Fam Pract.* 2003;20(4):420-4.

## Legends

1  
2  
3  
4 Table 1: Baseline characteristics for participants with low socioeconomic position allocated to a preventive  
5 health check at the general practitioner ('Check-In') or to usual care. Values are number (percentages)  
6 unless stated otherwise.  
7  
8  
9

10  
11 Table 2: Effectiveness of 'Check-In' on smoking status (primary outcome) and other health behaviour at 12-  
12 months follow-up measured as dichotomized outcomes. Values are number (percentages), ORs and *p*  
13 values for the intervention effectiveness. The analyses are performed as per protocol and ITT with multiple  
14 imputation.  
15  
16  
17  
18  
19

20  
21 Table 3: Effectiveness of 'Check-In' on health behaviour measured as continuous outcomes at 12-months  
22 follow-up measured as continuous outcomes. The analyses are performed as per protocol and ITT with  
23 multiple imputation.  
24  
25  
26  
27

28  
29 Table 4: Effectiveness of 'Check-In' on incidence of chronic obstructive pulmonary disease, diabetes,  
30 disorder of the thyroid gland, hypertension and hypercholesterolemia. The analyses are performed per  
31 protocol and as ITT.  
32  
33  
34

35  
36 Figure 1: CONSORT flow diagram showing recruitment of general practices and patients in Check-In  
37  
38

39  
40 Supplementary file 1: Example of the study-specific electronic data interchange message to the GP,  
41 computed based on the patient-reported questionnaire, including summarized scores and categorization of  
42 items – and showing the different options. Translated from the Danish version used in the intervention  
43  
44  
45

46  
47 Supplementary file 2: Assessment specification of primary outcome (smoking status) and secondary  
48 outcomes (other patient-reported health behaviour)  
49  
50

51  
52 Supplementary file 3: Algorithms used to define the metabolic risk factors and non-communicable diseases  
53  
54

55  
56 Supplementary file 4: Effectiveness of Check-In on prevalence of non-communicable diseases at 12-month  
57 follow-up. The analyses are performed per protocol and as ITT  
58  
59  
60

1  
2  
3  
4 Supplementary file 5: Baseline characteristics for those lost to follow-up and those not lost to follow-up, by  
5  
6 allocated group  
7  
8  
9  
10  
11  
12  
13  
14  
15  
16  
17  
18  
19  
20  
21  
22  
23  
24  
25  
26  
27  
28  
29  
30  
31  
32  
33  
34  
35  
36  
37  
38  
39  
40  
41  
42  
43  
44  
45  
46  
47  
48  
49  
50  
51  
52  
53  
54  
55  
56  
57  
58  
59  
60

For peer review only

Table 1

|                                                                                                                       | 'Check-In' group<br>(n=549) | Usual care group<br>(n=555) |
|-----------------------------------------------------------------------------------------------------------------------|-----------------------------|-----------------------------|
| <b>Demographic and socioeconomic characteristics</b>                                                                  |                             |                             |
| Age, years [median (IQR <sup>2</sup> ;IQR <sup>3</sup> )]                                                             | 54 (49;59)                  | 54 (49;59)                  |
| Men                                                                                                                   | 282 (51)                    | 293 (53)                    |
| Danish/other Western ethnic background                                                                                | 437 (79)                    | 446 (81)                    |
| Married/cohabitant                                                                                                    | 279 (51)                    | 270 (49)                    |
| Children living at home                                                                                               | 137 (25)                    | 134 (24)                    |
| Employment status                                                                                                     |                             |                             |
| Employed                                                                                                              | 269 (49)                    | 266 (48)                    |
| Unemployed/social security                                                                                            | 224 (41)                    | 239 (43)                    |
| Retired/other                                                                                                         | 56 (10)                     | 49 (9)                      |
| <b>Health behaviour</b>                                                                                               |                             |                             |
| Cigarette smoking                                                                                                     |                             |                             |
| Daily smoker                                                                                                          | 228 (42)                    | 225 (41)                    |
| Not daily smoker                                                                                                      | 312 (58)                    | 326 (59)                    |
| Cigarettes/day <sup>*</sup> , [median (IQR <sup>2</sup> ;IQR <sup>3</sup> )]                                          | 18 (10;20)                  | 20 (10;20)                  |
| Current non-drinkers                                                                                                  | 171 (32)                    | 174 (32)                    |
| Drinks/week <sup>‡</sup> , [median (IQR <sup>2</sup> ;IQR <sup>3</sup> )]                                             | 6 (3; 15)                   | 6 (2; 16)                   |
| Binge drinking at least weekly                                                                                        | 94 (17)                     | 110 (20)                    |
| Physical inactivity <sup>§</sup>                                                                                      | 268 (49)                    | 286 (52)                    |
| BMI (kg/m <sup>2</sup> ), [median (IQR <sup>2</sup> ;IQR <sup>3</sup> )]                                              | 25.9 (23.1;29.1)            | 26.2 (23.4;29.7)            |
| Obese (BMI ≥ 30 kg/m <sup>2</sup> )                                                                                   | 104 (20)                    | 124 (23)                    |
| Self-rated bad to very bad health                                                                                     | 213 (39)                    | 225 (41)                    |
| Self-efficacy, [median (IQR <sup>2</sup> ;IQR <sup>3</sup> )]                                                         | 29 (24;33)                  | 29 (24;33)                  |
| <b>Morbidity and contact with GP</b>                                                                                  |                             |                             |
| Non-communicable diseases                                                                                             |                             |                             |
| Any chronic condition                                                                                                 | 337 (61)                    | 359 (65)                    |
| Hypertension                                                                                                          | 118 (22)                    | 133 (24)                    |
| Hypercholesterolemia                                                                                                  | 97 (18)                     | 99 (18)                     |
| COPD                                                                                                                  | 124 (23)                    | 127 (23)                    |
| Diabetes                                                                                                              | 175 (32)                    | 191 (34)                    |
| Hypothyroidism                                                                                                        | 55 (10)                     | 44 (8)                      |
| Hyperthyroidism                                                                                                       | 24 (4)                      | 22 (4)                      |
| Depression                                                                                                            | 79 (15)                     | 81 (15)                     |
| Number of non-communicable diseases                                                                                   |                             |                             |
| 0                                                                                                                     | 212 (39)                    | 196 (35)                    |
| 1                                                                                                                     | 147 (27)                    | 149 (27)                    |
| 2                                                                                                                     | 93 (17)                     | 112 (20)                    |
| ≥3                                                                                                                    | 97 (18)                     | 98 (18)                     |
| Contact with GP within the last year                                                                                  | 495 (90)                    | 480 (87)                    |
| Number of contacts with the GP within the last year <sup>&amp;</sup> , [median (IQR <sup>2</sup> ;IQR <sup>3</sup> )] | 7 (4;13)                    | 8 (4;14)                    |

<sup>\*</sup>Among daily smokers; <sup>‡</sup>among those who drink alcohol; <sup>&</sup>among those who visit their GP within the last year; <sup>§</sup>less than 150 minutes of moderate-intensity physical activity.

Table 2

|                                     | n (%)                          |                                | Effectiveness<br>(‘Check-In’ vs usual care) |         |
|-------------------------------------|--------------------------------|--------------------------------|---------------------------------------------|---------|
|                                     | ‘Check-In’<br>group<br>(n=549) | Usual care<br>group<br>(n=555) | OR (95% CI)                                 | P value |
| <b>Dichotomies outcomes</b>         |                                |                                |                                             |         |
| <b>Primary outcome</b>              |                                |                                |                                             |         |
| Daily smokers                       |                                |                                |                                             |         |
| Per protocol, n=710                 | 94 (31)                        | 147 (36)                       | 0.80 (0.58-1.09)                            | 0.16    |
| ITT; multiple imputation            | 203 (37)                       | 205 (37)                       | 0.99 (0.76-1.30)                            | 0.95    |
| <b>Secondary outcomes</b>           |                                |                                |                                             |         |
| Binge drinking ≥ weekly             |                                |                                |                                             |         |
| Per protocol, n=718                 | 55 (18)                        | 84 (20)                        | 0.87 (0.60-1.27)                            | 0.48    |
| ITT; multiple imputation            | 98 (18)                        | 116 (21)                       | 0.82 (0.59-1.14)                            | 0.24    |
| Physical inactivity (<150 min/week) |                                |                                |                                             |         |
| Per protocol, n=721                 | 132 (43)                       | 186 (45)                       | 0.92 (0.68-1.23)                            | 0.56    |
| ITT; multiple imputation            | 252 (46)                       | 260 (47)                       | 0.97 (0.74-1.27)                            | 0.84    |
| Obese (BMI ≥ 30 kg/m <sup>2</sup> ) |                                |                                |                                             |         |
| Per protocol, n=684                 | 68 (23)                        | 90 (23)                        | 1.01 (0.71-1.45)                            | 0.95    |
| ITT; multiple imputation            | 131 (24)                       | 122 (22)                       | 0.90 (0.67-1.21)                            | 0.93    |



1  
2  
3  
4  
5  
6  
7  
8  
9  
10  
11  
12  
13  
14  
15  
16  
17  
18  
19  
20  
21  
22  
23  
24  
25  
26  
27  
28  
29  
30  
31  
32  
33  
34  
35  
36  
37  
38  
39  
40  
41  
42  
43  
44  
45  
46  
47  
48  
49  
50  
51  
52  
53  
54  
55  
56  
57  
58  
59  
60

Table 3:

| Continuous outcomes          | Median (IQR <sup>2</sup> ;IQR <sup>3</sup> ) |                             | Effectiveness<br>(‘Check-In’ vs usual<br>care) | P value                           |
|------------------------------|----------------------------------------------|-----------------------------|------------------------------------------------|-----------------------------------|
|                              | ‘Check-In’ group<br>(n=549)                  | Usual care group<br>(n=555) | Coef. (95% CI)                                 | Median<br>regression <sup>‡</sup> |
| Cigarettes/day <sup>#</sup>  |                                              |                             |                                                |                                   |
| Per protocol, n=239          | 17 (14;20)                                   | 15 (10;20)                  | 2 (-4.7-8.7)                                   | 0.35                              |
| ITT; multiple imputation     | 15 (7;20)                                    | 15 (7;20)                   | 0 (-2.9-2.9)                                   | 0.99                              |
| Drinks/week <sup>&amp;</sup> |                                              |                             |                                                |                                   |
| Per protocol, n=419          | 7 (4;19)                                     | 8 (4;17)                    | -1 (-2.8-0.8)                                  | 0.38                              |
| ITT; multiple imputation     | 7 (4;17)                                     | 7 (4;15)                    | 0 (-1.7-1.8)                                   | 0.95                              |
| BMI                          |                                              |                             |                                                |                                   |
| Per protocol, n=684          | 25.9 (23.5;29.7)                             | 26.4 (23.8;29.6)            | -0.5 (-1.2-0.2)                                | 0.19                              |
| ITT; multiple imputation     | 25.9 (23.2;29.4)                             | 26.4 (23.6;29.8)            | -0.5 (-1.2-0.1)                                | 0.11                              |

<sup>‡</sup>Median regression estimates the median of the dependent variable; <sup>#</sup>Among daily smokers; <sup>&</sup>Among those who drink alcohol

Table 4

|                                        | n (%)               |                     | Effectiveness<br>(‘Check-In’ vs Usual<br>care) |         |
|----------------------------------------|---------------------|---------------------|------------------------------------------------|---------|
|                                        | ‘Check-In’<br>group | Usual care<br>group | OR (95% CI)                                    | p value |
| Any new chronic condition <sup>#</sup> |                     |                     |                                                |         |
| Per protocol, n=919                    | 82 (23)             | 120 (22)            | 1.05 (0.77-1.45)                               | 0.75    |
| ITT, n=1104                            | 125 (23)            | 120 (22)            | 1.07 (0.80-1.42)                               | 0.65    |
| Hypertension                           |                     |                     |                                                |         |
| Per protocol, n=704                    | 40 (14)             | 60 (14)             | 1.01 (0.66-1.56)                               | 0.96    |
| ITT, n=856                             | 55 (13)             | 60 (14)             | 0.88 (0.60-1.31)                               | 0.54    |
| Hypercholesterolemia                   |                     |                     |                                                |         |
| Per protocol, n=752                    | 13 (4)              | 20 (4)              | 1.00 (0.49-2.05)                               | 0.99    |
| ITT, n=908                             | 18 (4)              | 20 (4)              | 0.90 (0.47-1.73)                               | 0.76    |
| Chronic Obstructive Pulmonary Disease  |                     |                     |                                                |         |
| Per protocol, n=711                    | 19 (7)              | 23 (5)              | 1.24 (0.66-2.31)                               | 0.51    |
| ITT, n=844                             | 32 (8)              | 23 (5)              | 1.44 (0.83-2.50)                               | 0.20    |
| Diabetes mellitus                      |                     |                     |                                                |         |
| Per protocol, n=604                    | 8 (3)               | 15 (4)              | 0.74 (0.31-1.76)                               | 0.49    |
| ITT, n=720                             | 14 (4)              | 15 (4)              | 0.89 (0.42-1.87)                               | 0.76    |
| Hypothyroidism <sup>‡</sup>            |                     |                     |                                                |         |
| Per protocol, n=919                    | -                   | -                   | -                                              | -       |
| ITT, n=840                             | -                   | -                   | -                                              | -       |
| Hyperthyroidism <sup>‡</sup>           |                     |                     |                                                |         |
| Per protocol, n=878                    | -                   | -                   | -                                              | -       |
| ITT, n=1051                            | -                   | -                   | -                                              | -       |
| Depression                             |                     |                     |                                                |         |
| Per protocol, n=789                    | 12 (4)              | 9 (2)               | 2.05 (0.85-4.91)                               | 0.11    |
| ITT, n=944                             | 25 (5)              | 9 (2)               | 2.90 (1.34-6.29)                               | 0.007   |

<sup>#</sup>Hypertension if no hypertension at baseline, hypercholesterolemia if no hypercholesterolemia at baseline, COPD if no COPD at baseline, diabetes if no diabetes at baseline, hypothyroidism if no hypothyroidism at baseline, hyperthyroidism if no hyperthyroidism at baseline or depression if no depression at baseline

<sup>‡</sup>Too few in each group to report for ethical reasons

Figure 1: CONSORT flow diagram showing recruitment of general practices and patients in 'Check-In'

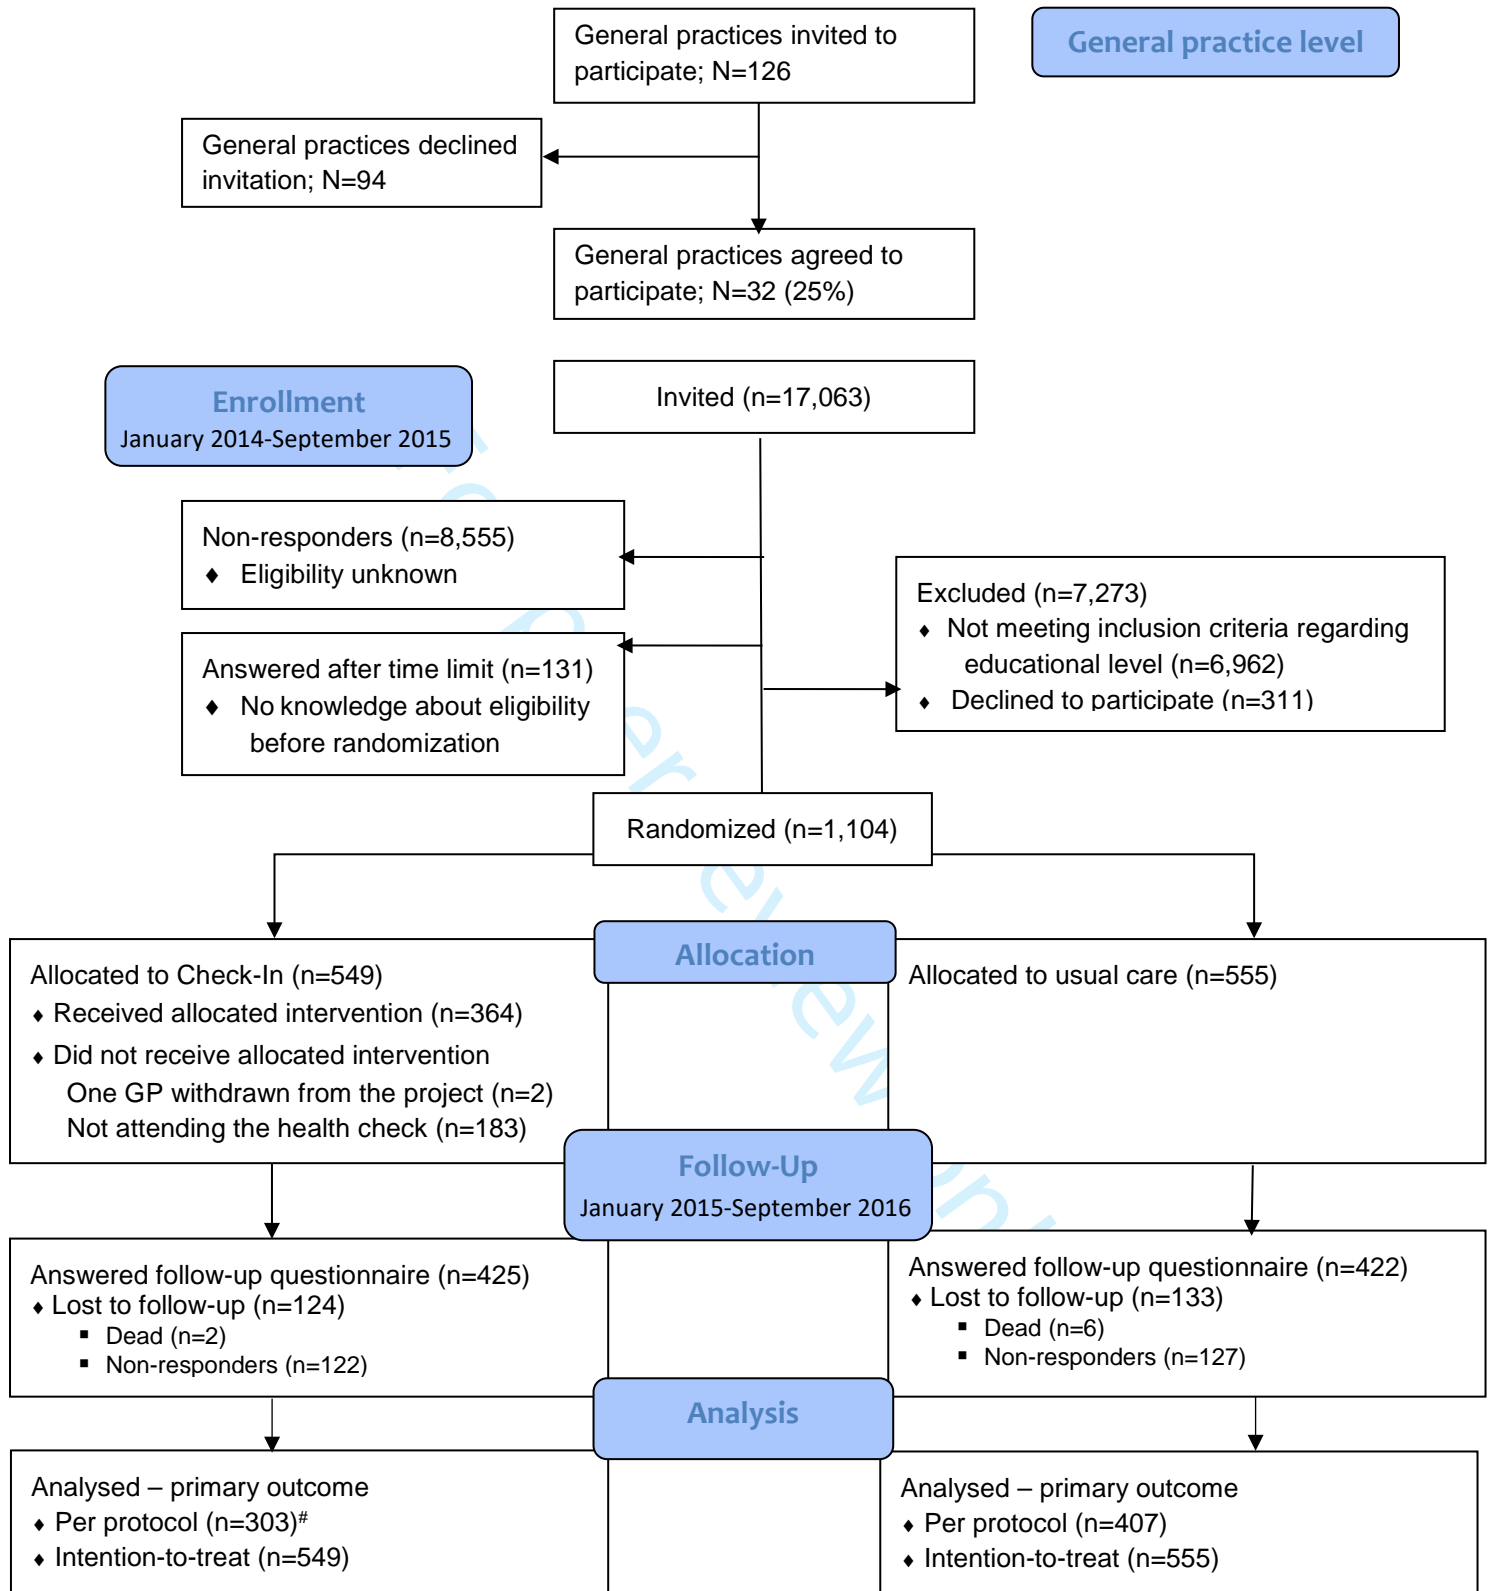

<sup>#</sup> In the per protocol analyses are only included individuals who responded the questionnaire and who followed the 'treatment' for the allocated group (for individuals allocated to intervention this meant attending the health check and responding to the questionnaire; for individuals allocated to usual care this meant responding to the questionnaire). Hence, of the 425 responders in the intervention group 303 individuals attended the health check and could be included in the per protocol analyse. Of the 422 responders in the usual care group 407 answered the questions regarding the smoking status and could be included in the per protocol analyse.

## Supplementary 1

*Sender:* DAK-E

*Headline:* Results from patient-reported factors

*Overall result:* the patient has an overall increased risk of developing a chronic disease / the patient is at no risk of a chronic disease

*School and educational level:* the patient has basic/upper secondary school level and no education/special worker/vocational education/short education/medium education/long/other/missing.

*Social:* The patient lives alone/with partner; with children living at home/without children living at home

*Weight (kilograms):*

*BMI:* < 18.5 underweight / 18.5-24.9 normal weight / 25-30 overweight / >30 obese

*Smoker status:* Daily smoker/occasional smoker/ex-smoker/never

*Cigarettes per day:*

*COPD risk score:* Score 0-4 dyspnoea is not caused by COPD / score 5-10 dyspnoea is probably caused by COPD

*Alcohol consumption per week (number of units):*

*Frequency of binge-drinking:* daily/weekly/monthly/rarely/never

*Follows the Danish Health Authority recommendations for alcohol consumption:* yes/no

*Diet score:* 0-4 unhealthy dietary habits / 5-8 dietary habits can be improved / 9-12 healthy dietary habits

*Specification of diet:* high intake of sugar/low intake of fruit and berries/low intake of vegetables and root crops/low intake of fish and seafood.

*Physical activity (minutes per week):*

*Follows the Danish Health Authority recommendations of 150 minutes of physical activity per week:* yes/no

*Specification:* low physical training/low everyday exercise

*Diseases in the near family:* hypertension/hypercholesterolemia/blood clots in the heart/blood clots in the brain/blood clots in the lungs or legs/diabetes/COPD/don't know/none

*Self-rated health:* excellent/very good/good/bad/very bad

*Confidence in own ability to act (self-efficacy):* the patient has under/over average confidence in own ability to act

*Stress level:* not high stress level/high stress level (high stress level = stress level  $\geq 15$  for men and stress level  $\geq 17$  for women)

## Supplementary 2

| Outcome                          | Items                                                                                                                                                                                                                   | Response categories                                                                                                                                                                                                                                                                                                               |
|----------------------------------|-------------------------------------------------------------------------------------------------------------------------------------------------------------------------------------------------------------------------|-----------------------------------------------------------------------------------------------------------------------------------------------------------------------------------------------------------------------------------------------------------------------------------------------------------------------------------|
| <b>Smoking (primary outcome)</b> | <i>"Do you smoke?"</i>                                                                                                                                                                                                  | <ol style="list-style-type: none"> <li>1. "Yes, daily"</li> <li>2. "Yes, I smoke occasionally"</li> <li>3. "No, I stopped less than six months ago"</li> <li>4. "No, I stopped more than six months ago"</li> <li>5. "No, I have never smoked"</li> </ol>                                                                         |
|                                  | <i>"How much do you approximately smoke each day? / How much did you approximately smoke at the time you smoked?"</i>                                                                                                   | Number of cigarettes per day: ____<br>Number of cheroots per day: ____<br>Number of cigars per day: ____<br>Number of pipe stops per day: ____                                                                                                                                                                                    |
| <b>Alcohol</b>                   | <i>"Do you drink alcohol?"</i>                                                                                                                                                                                          | <ol style="list-style-type: none"> <li>1. "Yes"</li> <li>2. "No, never"</li> </ol>                                                                                                                                                                                                                                                |
|                                  | <i>"How many units of alcohol do you typically drink each day during the week?"</i>                                                                                                                                     | For each day in the week note:<br>Units of beer:<br>Units of wine:<br>Units of liquor:                                                                                                                                                                                                                                            |
|                                  | <i>"How often do you drink more than five units of alcohol on the same occasion?"</i>                                                                                                                                   | <ol style="list-style-type: none"> <li>1. "Daily or almost daily"</li> <li>2. "Weekly"</li> <li>3. "Monthly"</li> <li>4. "Rarely"</li> <li>5. "Never"</li> </ol>                                                                                                                                                                  |
| <b>Physical activity</b>         | <i>"For how many hours during a week do you perform exercise that makes you short of breath (e.g. running, soccer, aerobics, tennis, jogging or similar)?"</i>                                                          | <ol style="list-style-type: none"> <li>1. "0 minutes"</li> <li>2. "Less than 30 minutes"</li> <li>3. "30-60 minutes (½-1 hour)"</li> <li>4. "60-120 minutes (1-2 hours)"</li> <li>5. "More than 120 minutes (more than 2 hours)"</li> </ol>                                                                                       |
|                                  | <i>"For how many hours during a week do you perform light exercise? / How much time during the week do you spend on everyday exercise (e.g. a walk, easy gardening, cleaning, biking to and from work or similar)?"</i> | <ol style="list-style-type: none"> <li>1. "0 minutes"</li> <li>2. "Less than 30 minutes"</li> <li>3. "30-60 minutes (½-1 hour)"</li> <li>4. "60-90 minutes (1-1½ hours)"</li> <li>5. "90-150 minutes (1½-2½ hours)"</li> <li>6. "150-300 minutes (2½-5 hours)"</li> <li>7. "More than 300 minutes (more than 5 hours)"</li> </ol> |
| <b>BMI</b>                       | BMI is generated from these two items:<br><i>"What is your height? (in centimetres)"</i><br><i>"What is your weight? (in kilos)"</i>                                                                                    | $BMI = \frac{\text{weight in kilos}}{(\text{height in metres})^2}$                                                                                                                                                                                                                                                                |

## Supplementary 3

| Condition                             | ICD-10 codes from the Danish National Patient Register | ATC-codes from the Danish National Prescription Registry                                                                                            | Definition                                                                                                                                                                    |
|---------------------------------------|--------------------------------------------------------|-----------------------------------------------------------------------------------------------------------------------------------------------------|-------------------------------------------------------------------------------------------------------------------------------------------------------------------------------|
| Hypertension                          | I11, I12, I13, I15                                     | C07B, C03A, C03B, C03E, C03X; or C03C, C03D, C07A, C09 if person does not have ICD I20, I21, I25.1, I50; or C08 if person does not have ICD I20-25# | Diagnosis and/or medicine C07B, C03A, C03B, C03E, C03X; or C03C, C03D, C07A, C09 if person does not have ICD I20, I21, I25.1, I50; or C08 if person does not have ICD I20-25# |
| Hypercholesterolemia                  |                                                        | C10                                                                                                                                                 | Medicine                                                                                                                                                                      |
| Chronic Obstructive Pulmonary Disease | J44                                                    | R03                                                                                                                                                 | Diagnose and/or medicine                                                                                                                                                      |
| Diabetes mellitus                     | E10, E11, E12, E13, E14                                | A10                                                                                                                                                 | Diagnosis and/or medicine                                                                                                                                                     |
| Hypothyroidism                        | E02, E03, E063                                         | H03AA01                                                                                                                                             | Diagnosis and/or medicine                                                                                                                                                     |
| Hyperthyroidism                       | E05, E062                                              | H03B                                                                                                                                                | Diagnosis and/or medicine                                                                                                                                                     |
| Depression                            | F32, F33                                               | N06A                                                                                                                                                | Diagnosis and/or medicine                                                                                                                                                     |

# to exclude treatment for underlying heart disease

## Supplementary 4

|                                       | n (%)             |                     | Effectiveness<br>(Check-In vs Usual care) |         |
|---------------------------------------|-------------------|---------------------|-------------------------------------------|---------|
|                                       | Check-In<br>group | Usual care<br>group | OR (95% CI)                               | p value |
| Any chronic condition <sup>#</sup>    |                   |                     |                                           |         |
| Per protocol, n=919                   | 202 (56)          | 306 (55)            | 1.01 (0.78-1.32)                          | 0.92    |
| ITT, n=1104                           | 296 (54)          | 306 (55)            | 0.93 (0.75-1.21)                          | 0.68    |
| Hypertension                          |                   |                     |                                           |         |
| Per protocol, n=919                   | 111 (30)          | 172 (31)            | 0.98 (0.73-1.30)                          | 0.87    |
| ITT, n=1104                           | 154 (28)          | 172 (31)            | 0.87 (0.67-1.12)                          | 0.28    |
| Hypercholesterolemia                  |                   |                     |                                           |         |
| Per protocol, n=919                   | 77 (21)           | 113 (20)            | 1.05 (0.76-1.45)                          | 0.77    |
| ITT, n=1104                           | 106 (19)          | 113 (20)            | 0.94 (0.70-1.26)                          | 0.66    |
| Chronic Obstructive Pulmonary Disease |                   |                     |                                           |         |
| Per protocol, n=919                   | 59 (16)           | 81 (15)             | 1.13 (0.79-1.63)                          | 0.51    |
| ITT, n=1104                           | 91 (17)           | 81 (15)             | 1.16 (0.84-1.61)                          | 0.36    |
| Diabetes mellitus                     |                   |                     |                                           |         |
| Per protocol, n=919                   | 57 (16)           | 83 (15)             | 1.06 (0.73-1.52)                          | 0.77    |
| ITT, n=1104                           | 87 (16)           | 83 (15)             | 1.07 (0.77-1.49)                          | 0.68    |
| Hypothyroidism                        |                   |                     |                                           |         |
| Per protocol, n=919                   | 19 (5)            | 26 (5)              | 1.12 (0.61-2.06)                          | 0.71    |
| ITT, n=1104                           | 29 (5)            | 26 (5)              | 1.13 (0.65-1.95)                          | 0.65    |
| Hyperthyroidism <sup>‡</sup>          |                   |                     |                                           |         |
| Per protocol, n=919                   | -                 | -                   | -                                         | -       |
| ITT, n=1104                           | -                 | -                   | -                                         | -       |
| Depression                            |                   |                     |                                           |         |
| Per protocol, n=919                   | 48 (13)           | 71 (13)             | 1.04 (0.70-1.53)                          | 0.86    |
| ITT, n=1104                           | 80 (15)           | 71 (13)             | 1.16 (0.82-1.64)                          | 0.39    |

<sup>#</sup>Hypertension, hypercholesterolemia, COPD, diabetes, hypothyroidism, hyperthyroidism or depression

<sup>‡</sup>Too few in each group to report for ethical reasons

## Supplementary 5

| Baseline characteristics                    | Lost to follow-up       |                           | Not lost to follow-up   |                           |
|---------------------------------------------|-------------------------|---------------------------|-------------------------|---------------------------|
|                                             | Check-In group<br>N (%) | Usual care group<br>N (%) | Check-In group<br>N (%) | Usual care group<br>N (%) |
| <b>Age, years [median (IQR)]</b>            | 53 [48;57]              | 54 [49;57]                | 55 [50;59]              | 55 [50;59]                |
| <b>Men</b>                                  | 81 (61)                 | 61 (49)                   | 212 (50)                | 221 (52)                  |
| <b>Daily smoker</b>                         | 64 (48)                 | 66 (54)                   | 161 (38)                | 162 (39)                  |
| <b>Binge drinking</b>                       | 29 (23)                 | 16 (14)                   | 81 (20)                 | 78 (19)                   |
| <b>Physical inactive</b>                    | 86 (66)                 | 69 (57)                   | 200 (48)                | 199 (47)                  |
| <b>Obese</b>                                | 30 (24)                 | 28 (25)                   | 94 (23)                 | 76 (18)                   |
| <b>Contact with GP within the last year</b> | 114 (86)                | 112 (90)                  | 366 (87)                | 383 (90)                  |

For peer review only



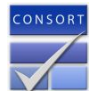

## CONSORT 2010 checklist of information to include when reporting a randomised trial\*

| Section/Topic                    | Item No | Checklist item                                                                                                                                                                              | Reported on page No |
|----------------------------------|---------|---------------------------------------------------------------------------------------------------------------------------------------------------------------------------------------------|---------------------|
| <b>Title and abstract</b>        |         |                                                                                                                                                                                             |                     |
|                                  | 1a      | Identification as a randomised trial in the title                                                                                                                                           | 1                   |
|                                  | 1b      | Structured summary of trial design, methods, results, and conclusions (for specific guidance see CONSORT for abstracts)                                                                     | 2, 3                |
| <b>Introduction</b>              |         |                                                                                                                                                                                             |                     |
| Background and objectives        | 2a      | Scientific background and explanation of rationale                                                                                                                                          | 4, 5                |
|                                  | 2b      | Specific objectives or hypotheses                                                                                                                                                           | 5                   |
| <b>Methods</b>                   |         |                                                                                                                                                                                             |                     |
| Trial design                     | 3a      | Description of trial design (such as parallel, factorial) including allocation ratio                                                                                                        | 5                   |
|                                  | 3b      | Important changes to methods after trial commencement (such as eligibility criteria), with reasons                                                                                          | None                |
| Participants                     | 4a      | Eligibility criteria for participants                                                                                                                                                       | 6                   |
|                                  | 4b      | Settings and locations where the data were collected                                                                                                                                        | 5, 7, 8, 9          |
| Interventions                    | 5       | The interventions for each group with sufficient details to allow replication, including how and when they were actually administered                                                       | 6, 7                |
| Outcomes                         | 6a      | Completely defined pre-specified primary and secondary outcome measures, including how and when they were assessed                                                                          | 8, 9                |
|                                  | 6b      | Any changes to trial outcomes after the trial commenced, with reasons                                                                                                                       | None                |
| Sample size                      | 7a      | How sample size was determined                                                                                                                                                              | 9, 10               |
|                                  | 7b      | When applicable, explanation of any interim analyses and stopping guidelines                                                                                                                | None                |
| <b>Randomisation:</b>            |         |                                                                                                                                                                                             |                     |
| Sequence generation              | 8a      | Method used to generate the random allocation sequence                                                                                                                                      | 6                   |
|                                  | 8b      | Type of randomisation; details of any restriction (such as blocking and block size)                                                                                                         | 6                   |
| Allocation concealment mechanism | 9       | Mechanism used to implement the random allocation sequence (such as sequentially numbered containers), describing any steps taken to conceal the sequence until interventions were assigned | 6                   |
| Implementation                   | 10      | Who generated the random allocation sequence, who enrolled participants, and who assigned participants to interventions                                                                     | 6, 7                |
| Blinding                         | 11a     | If done, who was blinded after assignment to interventions (for example, participants, care providers, those                                                                                |                     |

|                                                      |     |                                                                                                                                                   |                      |
|------------------------------------------------------|-----|---------------------------------------------------------------------------------------------------------------------------------------------------|----------------------|
|                                                      |     | assessing outcomes) and how                                                                                                                       | 6                    |
|                                                      | 11b | If relevant, description of the similarity of interventions                                                                                       | Not relevant         |
| Statistical methods                                  | 12a | Statistical methods used to compare groups for primary and secondary outcomes                                                                     | 10, 11               |
|                                                      | 12b | Methods for additional analyses, such as subgroup analyses and adjusted analyses                                                                  | 11                   |
| <b>Results</b>                                       |     |                                                                                                                                                   |                      |
| Participant flow (a diagram is strongly recommended) | 13a | For each group, the numbers of participants who were randomly assigned, received intended treatment, and were analysed for the primary outcome    | Figure 1             |
|                                                      | 13b | For each group, losses and exclusions after randomisation, together with reasons                                                                  | Figure 1             |
| Recruitment                                          | 14a | Dates defining the periods of recruitment and follow-up                                                                                           | 5                    |
|                                                      | 14b | Why the trial ended or was stopped                                                                                                                | 5                    |
| Baseline data                                        | 15  | A table showing baseline demographic and clinical characteristics for each group                                                                  | Table 1              |
| Numbers analysed                                     | 16  | For each group, number of participants (denominator) included in each analysis and whether the analysis was by original assigned groups           | Table 2-4            |
| Outcomes and estimation                              | 17a | For each primary and secondary outcome, results for each group, and the estimated effect size and its precision (such as 95% confidence interval) | Table 2-4            |
|                                                      | 17b | For binary outcomes, presentation of both absolute and relative effect sizes is recommended                                                       | Table 2, 4           |
| Ancillary analyses                                   | 18  | Results of any other analyses performed, including subgroup analyses and adjusted analyses, distinguishing pre-specified from exploratory         | 13 and supplementary |
| Harms                                                | 19  | All important harms or unintended effects in each group (for specific guidance see CONSORT for harms)                                             | 13                   |
| <b>Discussion</b>                                    |     |                                                                                                                                                   |                      |
| Limitations                                          | 20  | Trial limitations, addressing sources of potential bias, imprecision, and, if relevant, multiplicity of analyses                                  | 15, 16               |
| Generalisability                                     | 21  | Generalisability (external validity, applicability) of the trial findings                                                                         | 16                   |
| Interpretation                                       | 22  | Interpretation consistent with results, balancing benefits and harms, and considering other relevant evidence                                     | 14, 16               |
| <b>Other information</b>                             |     |                                                                                                                                                   |                      |
| Registration                                         | 23  | Registration number and name of trial registry                                                                                                    | 18                   |
| Protocol                                             | 24  | Where the full trial protocol can be accessed, if available                                                                                       | Not published        |
| Funding                                              | 25  | Sources of funding and other support (such as supply of drugs), role of funders                                                                   | 19                   |

\*We strongly recommend reading this statement in conjunction with the CONSORT 2010 Explanation and Elaboration for important clarifications on all the items. If relevant, we also recommend reading CONSORT extensions for cluster randomised trials, non-inferiority and equivalence trials, non-pharmacological treatments, herbal interventions, and pragmatic trials. Additional extensions are forthcoming: for those and for up to date references relevant to this checklist, see [www.consort-statement.org](http://www.consort-statement.org).
