# Supplementary material for: The effectiveness of general practice-based health checks on health behaviour and incidence on non-communicable diseases in individuals with low socioeconomic position: a randomised controlled trial in Denmark
Source: PubMed Central journal article supplement — BMJ Open. 2019 Sep 18;9(9):e029180. doi: 10.1136/bmjopen-2019-029180 (PMC6756442; doi:10.1136/bmjopen-2019-029180), 2019-09-18
Supplement: bmjopen-2019-029180supp002.pdf [file bmjopen-2019-029180supp002.pdf]

## Supplementary 2

| Outcome                          | Items                                                                                                                                                                                                            | Response categories                                                                                                                                                                                                                                                                                                               |
|----------------------------------|------------------------------------------------------------------------------------------------------------------------------------------------------------------------------------------------------------------|-----------------------------------------------------------------------------------------------------------------------------------------------------------------------------------------------------------------------------------------------------------------------------------------------------------------------------------|
| <b>Smoking (primary outcome)</b> | "Do you smoke?"                                                                                                                                                                                                  | <ol style="list-style-type: none"> <li>1. "Yes, daily"</li> <li>2. "Yes, I smoke occasionally"</li> <li>3. "No, I stopped less than six months ago"</li> <li>4. "No, I stopped more than six months ago"</li> <li>5. "No, I have never smoked"</li> </ol>                                                                         |
|                                  | "How much do you approximately smoke each day? / How much did you approximately smoke at the time you smoked?"                                                                                                   | Number of cigarettes per day: ____<br>Number of cheroots per day: ____<br>Number of cigars per day: ____<br>Number of pipe stops per day: ____                                                                                                                                                                                    |
| <b>Alcohol</b>                   | "Do you drink alcohol?"                                                                                                                                                                                          | <ol style="list-style-type: none"> <li>1. "Yes"</li> <li>2. "No, never"</li> </ol>                                                                                                                                                                                                                                                |
|                                  | "How many units of alcohol do you typically drink each day during the week?"                                                                                                                                     | For each day in the week note:<br>Units of beer:<br>Units of wine:<br>Units of liquor:                                                                                                                                                                                                                                            |
|                                  | "How often do you drink more than five units of alcohol on the same occasion?"                                                                                                                                   | <ol style="list-style-type: none"> <li>1. "Daily or almost daily"</li> <li>2. "Weekly"</li> <li>3. "Monthly"</li> <li>4. "Rarely"</li> <li>5. "Never"</li> </ol>                                                                                                                                                                  |
| <b>Physical activity</b>         | "For how many hours during a week do you perform exercise that makes you short of breath (e.g. running, soccer, aerobics, tennis, jogging or similar)?"                                                          | <ol style="list-style-type: none"> <li>1. "0 minutes"</li> <li>2. "Less than 30 minutes"</li> <li>3. "30-60 minutes (½-1 hour)"</li> <li>4. "60-120 minutes (1-2 hours)"</li> <li>5. "More than 120 minutes (more than 2 hours)"</li> </ol>                                                                                       |
|                                  | "For how many hours during a week do you perform light exercise? / How much time during the week do you spend on everyday exercise (e.g. a walk, easy gardening, cleaning, biking to and from work or similar)?" | <ol style="list-style-type: none"> <li>1. "0 minutes"</li> <li>2. "Less than 30 minutes"</li> <li>3. "30-60 minutes (½-1 hour)"</li> <li>4. "60-90 minutes (1-1½ hours)"</li> <li>5. "90-150 minutes (1½-2½ hours)"</li> <li>6. "150-300 minutes (2½-5 hours)"</li> <li>7. "More than 300 minutes (more than 5 hours)"</li> </ol> |
| <b>BMI</b>                       | BMI is generated from these two items:<br>"What is your height? (in centimetres)"<br>"What is your weight? (in kilos)"                                                                                           | $BMI = \frac{\text{weight in kilos}}{(\text{height in metres})^2}$                                                                                                                                                                                                                                                                |
