# Supplementary material for: The effectiveness of general practice-based health checks on health behaviour and incidence on non-communicable diseases in individuals with low socioeconomic position: a randomised controlled trial in Denmark
Source: PubMed Central journal article supplement — BMJ Open. 2019 Sep 18;9(9):e029180. doi: 10.1136/bmjopen-2019-029180 (PMC6756442; doi:10.1136/bmjopen-2019-029180), 2019-09-18
Supplement: bmjopen-2019-029180supp003.pdf [file bmjopen-2019-029180supp003.pdf]

## Supplementary 3

| Condition                             | ICD-10 codes from the Danish National Patient Register | ATC-codes from the Danish National Prescription Registry                                                                                            | Definition                                                                                                                                                                    |
|---------------------------------------|--------------------------------------------------------|-----------------------------------------------------------------------------------------------------------------------------------------------------|-------------------------------------------------------------------------------------------------------------------------------------------------------------------------------|
| Hypertension                          | I11, I12, I13, I15                                     | C07B, C03A, C03B, C03E, C03X; or C03C, C03D, C07A, C09 if person does not have ICD I20, I21, I25.1, I50; or C08 if person does not have ICD I20-25# | Diagnosis and/or medicine C07B, C03A, C03B, C03E, C03X; or C03C, C03D, C07A, C09 if person does not have ICD I20, I21, I25.1, I50; or C08 if person does not have ICD I20-25# |
| Hypercholesterolemia                  |                                                        | C10                                                                                                                                                 | Medicine                                                                                                                                                                      |
| Chronic Obstructive Pulmonary Disease | J44                                                    | R03                                                                                                                                                 | Diagnose and/or medicine                                                                                                                                                      |
| Diabetes mellitus                     | E10, E11, E12, E13, E14                                | A10                                                                                                                                                 | Diagnosis and/or medicine                                                                                                                                                     |
| Hypothyroidism                        | E02, E03, E063                                         | H03AA01                                                                                                                                             | Diagnosis and/or medicine                                                                                                                                                     |
| Hyperthyroidism                       | E05, E062                                              | H03B                                                                                                                                                | Diagnosis and/or medicine                                                                                                                                                     |
| Depression                            | F32, F33                                               | N06A                                                                                                                                                | Diagnosis and/or medicine                                                                                                                                                     |

# to exclude treatment for underlying heart disease
