# Supplementary material for: The effectiveness of general practice-based health checks on health behaviour and incidence on non-communicable diseases in individuals with low socioeconomic position: a randomised controlled trial in Denmark
Source: PubMed Central journal article supplement — BMJ Open. 2019 Sep 18;9(9):e029180. doi: 10.1136/bmjopen-2019-029180 (PMC6756442; doi:10.1136/bmjopen-2019-029180), 2019-09-18
Supplement: bmjopen-2019-029180supp004.pdf [file bmjopen-2019-029180supp004.pdf]

## Supplementary 4

|                                       | n (%)             |                     | Effectiveness<br>(Check-In vs Usual care) |         |
|---------------------------------------|-------------------|---------------------|-------------------------------------------|---------|
|                                       | Check-In<br>group | Usual care<br>group | OR (95% CI)                               | p value |
| Any chronic condition <sup>#</sup>    |                   |                     |                                           |         |
| Per protocol, n=919                   | 202 (56)          | 306 (55)            | 1.01 (0.78-1.32)                          | 0.92    |
| ITT, n=1104                           | 296 (54)          | 306 (55)            | 0.93 (0.75-1.21)                          | 0.68    |
| Hypertension                          |                   |                     |                                           |         |
| Per protocol, n=919                   | 111 (30)          | 172 (31)            | 0.98 (0.73-1.30)                          | 0.87    |
| ITT, n=1104                           | 154 (28)          | 172 (31)            | 0.87 (0.67-1.12)                          | 0.28    |
| Hypercholesterolemia                  |                   |                     |                                           |         |
| Per protocol, n=919                   | 77 (21)           | 113 (20)            | 1.05 (0.76-1.45)                          | 0.77    |
| ITT, n=1104                           | 106 (19)          | 113 (20)            | 0.94 (0.70-1.26)                          | 0.66    |
| Chronic Obstructive Pulmonary Disease |                   |                     |                                           |         |
| Per protocol, n=919                   | 59 (16)           | 81 (15)             | 1.13 (0.79-1.63)                          | 0.51    |
| ITT, n=1104                           | 91 (17)           | 81 (15)             | 1.16 (0.84-1.61)                          | 0.36    |
| Diabetes mellitus                     |                   |                     |                                           |         |
| Per protocol, n=919                   | 57 (16)           | 83 (15)             | 1.06 (0.73-1.52)                          | 0.77    |
| ITT, n=1104                           | 87 (16)           | 83 (15)             | 1.07 (0.77-1.49)                          | 0.68    |
| Hypothyroidism                        |                   |                     |                                           |         |
| Per protocol, n=919                   | 19 (5)            | 26 (5)              | 1.12 (0.61-2.06)                          | 0.71    |
| ITT, n=1104                           | 29 (5)            | 26 (5)              | 1.13 (0.65-1.95)                          | 0.65    |
| Hyperthyroidism <sup>‡</sup>          |                   |                     |                                           |         |
| Per protocol, n=919                   | -                 | -                   | -                                         | -       |
| ITT, n=1104                           | -                 | -                   | -                                         | -       |
| Depression                            |                   |                     |                                           |         |
| Per protocol, n=919                   | 48 (13)           | 71 (13)             | 1.04 (0.70-1.53)                          | 0.86    |
| ITT, n=1104                           | 80 (15)           | 71 (13)             | 1.16 (0.82-1.64)                          | 0.39    |

<sup>#</sup>Hypertension, hypercholesterolemia, COPD, diabetes, hypothyroidism, hyperthyroidism or depression

<sup>‡</sup>Too few in each group to report for ethical reasons
