# Supplementary material for: The effectiveness of general practice-based health checks on health behaviour and incidence on non-communicable diseases in individuals with low socioeconomic position: a randomised controlled trial in Denmark
Source: PubMed Central journal article supplement — BMJ Open. 2019 Sep 18;9(9):e029180. doi: 10.1136/bmjopen-2019-029180 (PMC6756442; doi:10.1136/bmjopen-2019-029180), 2019-09-18
Supplement: bmjopen-2019-029180supp005.pdf [file bmjopen-2019-029180supp005.pdf]

## Supplementary 5

| Baseline characteristics                    | Lost to follow-up       |                           | Not lost to follow-up   |                           |
|---------------------------------------------|-------------------------|---------------------------|-------------------------|---------------------------|
|                                             | Check-In group<br>N (%) | Usual care group<br>N (%) | Check-In group<br>N (%) | Usual care group<br>N (%) |
| <b>Age, years [median (IQR)]</b>            | 53 [48;57]              | 54 [49;57]                | 55 [50;59]              | 55 [50;59]                |
| <b>Men</b>                                  | 81 (61)                 | 61 (49)                   | 212 (50)                | 221 (52)                  |
| <b>Daily smoker</b>                         | 64 (48)                 | 66 (54)                   | 161 (38)                | 162 (39)                  |
| <b>Binge drinking</b>                       | 29 (23)                 | 16 (14)                   | 81 (20)                 | 78 (19)                   |
| <b>Physical inactive</b>                    | 86 (66)                 | 69 (57)                   | 200 (48)                | 199 (47)                  |
| <b>Obese</b>                                | 30 (24)                 | 28 (25)                   | 94 (23)                 | 76 (18)                   |
| <b>Contact with GP within the last year</b> | 114 (86)                | 112 (90)                  | 366 (87)                | 383 (90)                  |
